1     **Differential growth and transcriptomic profile of stem cell-**  
2                     **derived midbrain astrocytes**

3     Zongze Li<sup>1&2</sup>, Lucia Fernandez Cardo<sup>1</sup>, Michal Rokicki<sup>1</sup>, Jimena Monzón-Sandoval<sup>1</sup>,  
4     Viola Volpato<sup>1</sup>, Frank Wessely<sup>1</sup>, Caleb Webber<sup>1\*</sup>, Meng 89Li<sup>2\*</sup>

5     <sup>1</sup> Dementia Research Institute, School of Medicine, Cardiff University, Hadyn Ellis  
6     Building, Maindy Road, Cardiff, CF24 4HQ, UK

7     <sup>2</sup> Neuroscience and Mental Health Innovation Institute, School of Medicine, Cardiff  
8     University, Hadyn Ellis Building, Maindy Road, Cardiff, CF24 4HQ, UK

9

10    \*Corresponding authors:

11             Meng Li, [lim26@cardiff.ac.uk](mailto:lim26@cardiff.ac.uk),

12             Caleb Webber, [webberc4@cardiff.ac.uk](mailto:webberc4@cardiff.ac.uk)

13

14    Key words: astrocyte, regional heterogeneity, ventral midbrain, dopaminergic, single  
15    cell RNA-sequencing

## 16 **Abstract**

17 Regional specificity of stem cell-derived astrocytes is believed to be an important  
18 prerequisite for their applications in disease modelling and cell-based therapies. The  
19 regional identity of these astrocytes is often defined by the positional characteristics  
20 of their antecedent, stem cell-derived neural progenitors patterned to a fate of  
21 interest, with the assumption that the positional specification is to be preserved by  
22 the derived astrocytes. Using a human induced pluripotent stem cell line designed  
23 for tracing midbrain floor plate derivatives, here we show that lineage composition of  
24 the derived astrocytes is not a faithful recapitulation of the founder progenitor  
25 population, as demonstrated by the loss of floor plate differentiated progeny in the  
26 final astrocyte products. Using deep single cell RNA sequencing, we identified  
27 distinct transcriptomic signatures of midbrain floor plate-derived astrocytes. Our  
28 study highlights the need for rigorous characterisation of pluripotent stem cell-  
29 derived regional astrocytes and provides a valuable resource for assessing midbrain  
30 floor plate-derived human astrocytes.

## 31 Introduction

32 Astrocytes are the most abundant cells in the brain. They play important roles in the  
33 central nervous system in supporting neuronal survival and synaptic activities,  
34 including the regulation of ionic homeostasis, providing energetic support, elimination  
35 of oxidative stress, and neurotransmitter removal and recycle (Verkhratsky and  
36 Nedergaard 2018). Abnormalities in astrocytes have been linked to various  
37 neurodegenerative and neurodevelopmental disorders, such as Parkinson's disease,  
38 Alzheimer's disease, Huntington's disease, autism spectrum disorders and  
39 Alexander's disease (Molofsky et al. 2012; Phatnani and Maniatis 2015; Booth et al.  
40 2017). There is therefore a growing interest in using human pluripotent stem cell  
41 (PSC)-derived astrocytes for disease modelling *in vitro* (Chandrasekaran et al. 2016).

42 Contrary to the widely held belief that astrocytes in the brain are largely identical,  
43 recent studies revealed diversity in their transcriptomic profile, physiological properties  
44 and function (Oberheim et al. 2009; Schober et al. 2022). For example, single cell and  
45 spatial transcriptomic studies have identified several astrocyte subpopulations in the  
46 mouse cortex (Zhu et al. 2018; Batiuk et al. 2020; Bayraktar et al. 2020). In human,  
47 although astrocyte heterogeneity remains largely elusive, heterogeneity in radial glia  
48 across brain regions and within midbrain has been reported (La Manno et al. 2016; Li  
49 et al. 2023). Furthermore, different molecular and physiological features and distinct  
50 responses to stimuli were also observed in astrocytes from different mouse brain  
51 regions (Takata and Hirase 2008; Chai et al. 2017; Morel et al. 2017; Itoh et al. 2018;  
52 Kostuk et al. 2019; Makarava et al. 2019; Xin et al. 2019; Lozzi et al. 2020). Indeed,  
53 astrocyte heterogeneity has been suggested to underly the regional susceptibility to  
54 human diseases (Schober et al. 2022). Therefore, recapitulating astrocyte regional  
55 specificity in PSC-derived astrocytes is generally accepted as an important  
56 prerequisite.

57 Several reports have described the generation of regional astrocytes from human  
58 embryonic stem cells or induced pluripotent stem cells (iPSCs) which include forebrain  
59 (Krencik et al. 2011; Zhou et al. 2016; Tcw et al. 2017; Lin et al. 2018; Bradley et al.  
60 2019; Hedegaard et al. 2020; Peteri et al. 2021), ventral midbrain (Booth et al. 2019;  
61 Barbuti et al. 2020; Crompton et al. 2021; de Rus Jacquet et al. 2021), hindbrain and

62 spinal cord (Roybon et al. 2013; Serio et al. 2013; Holmqvist et al. 2015; Bradley et al.  
63 2019; di Domenico et al. 2019; Yun et al. 2019). The regional identity of these  
64 astrocytes is typically evaluated at the stage of early neural progenitors generated via  
65 cell type- or region-directed neural patterning protocols, with the assumption that the  
66 positional characteristics will be faithfully preserved in the final astrocyte products.  
67 However, astrocyte production in vitro involves an extended period of astrocytic fate  
68 induction and progenitor expansion using FGF and EGF while substantial literature  
69 reported alterations in region-specific gene expression and/or neurogenic competence  
70 in expanded neural progenitors (Jain et al. 2003; Sun et al. 2008; Koch et al. 2009;  
71 Falk et al. 2012). Therefore, better characterisations of PSC-derived astrocytes and  
72 their lineage-specific features are needed to advance our knowledge about the  
73 molecular heterogeneity of human astrocytes.

74 Using a human iPSC line that allows the tracing of LMX1A expressing midbrain floor  
75 plate neural progenitors and their differentiated progeny (Cardo et al. 2023), we  
76 discovered an unexpected gradual depletion of LMX1A<sup>+</sup> progenitor progeny during  
77 astrocyte induction from a bulk population of ventral midbrain patterned progenitors  
78 despite LMX1A<sup>+</sup> progenitors being the predominant starting population. LMX1A<sup>+</sup>  
79 progenitor derived astrocytes can however be generated if astrocytic induction is  
80 initiated from purified LMX1A<sup>+</sup> progenitors, indicating that the positional constituents  
81 of the founding cell population may not be preserved faithfully in the derived  
82 astrocytes. Single cell RNA sequencing (scRNAseq) of astrocytes derived from both  
83 parental populations identified distinct transcriptomic signatures, providing a useful  
84 resource for assessment of human PSC-derived midbrain astrocytes.

## 85 **Results**

### 86 **Depletion of LMX1A<sup>+</sup> progenitors and/or derivatives in ventral** 87 **midbrain patterned neural progenitor cultures during astrogenic** 88 **induction**

89 To investigate whether regionally patterned neural progenitors retain their lineage  
90 identity during astrogenic induction and glial progenitor expansion, we made use of

91 the LMX1A-Cre/AAVS1-BFP iPSCs tracer line, which enables the tracking of LMX1A<sup>+</sup>  
92 midbrain floor plate progenitors and their differentiated progeny (Cardo et al. 2023)<sup>[OBJ]</sup>.  
93 We differentiated the LMX1A-Cre/AAVS1-BFP iPSCs towards the ventral midbrain  
94 fate following a modified protocol based on Jaeger *et al.* and Nolbrant *et al.* (Jaeger et  
95 al. 2011; Nolbrant et al. 2017)<sup>[OBJ]</sup> (Figure 1A). Immunocytochemistry of day (d)19  
96 cultures confirmed a high proportion of cells expressing BFP (96.01±0.42%) and  
97 ventral midbrain progenitor markers LMX1A (92.94±0.91%), FOXA2 (94.76±0.57%)  
98 and OTX2 (97.82±0.28%; Figure 1B-D with the original images shown in Figure S1A).  
99 Most cells (91.26±1.64%) co-expressed LMX1A and FOXA2 (Figure 1B and 1D). At  
100 this stage, all BFP<sup>+</sup> cells also stained positive to a pan neural progenitor marker  
101 NESTIN (Figure 1C). We detected a small proportion of cells expressing midbrain  
102 basal plate marker NKX6.1 (2.03±0.47%, Figure 1B-C) whose expression domain in  
103 the early developing ventral midbrain partially overlap with that of (Andersson et al.  
104 2006) (Andersson et al. 2006)<sup>[OBJ]</sup>. However, few PAX6<sup>+</sup> cells were present (Figure 1C),  
105 which marks the forebrain and (Duan et al. 2013) (Duan et al. 2013)<sup>[OBJ]</sup>.  
106 Immunocytochemical analysis of FACS-sorted BFP<sup>+</sup> cells confirmed highly enriched  
107 expression of LMX1A (95.51±0.09%) and FOXA2 (95.35±0.14%), and co-expression  
108 of both markers (94.68±0.10%; Figure 1B and 1D). In contrast, only a small number  
109 of LMX1A<sup>+</sup> cells (4.96±0.70%) were present in the sorted BFP<sup>-</sup> population (Figure 1B  
110 and 1D). These findings provide further support that BFP expression faithfully  
111 recapitulate LMX1A expression and that LMX1A<sup>+</sup> ventral midbrain progenitors  
112 represent the major cell population in d19 (Cardo et al. 2023) (Cardo et al. 2023)<sup>[OBJ]</sup>.

113 The d19 cells were then induced to undergo astrogenic switch in media containing  
114 FGF2 and EGF with the BFP content monitored by flow cytometry at each weekly  
115 passaging (Figure 1A, representative gating strategy is shown in Figure S1B-E). We  
116 found, unexpectedly, a dramatic decrease of BFP<sup>+</sup> cell proportion from the starting  
117 point of 88.20±1.10% to only 27.59±8.28% at d43 and to nearly absent as the  
118 differentiation continued (Figure 1E). We did not observe evident cell death during  
119 culture and replating; thus, the absence of BFP could be either due to the silencing of  
120 BFP expression in the derivatives of LMX1A<sup>+</sup> progenitors or the loss of these cells  
121 through growth competition. To address this question, we performed progenitor  
122 expansion and astrogenic induction under the same culture condition with purified d19

123 BFP<sup>+</sup> progenitors isolated using fluorescence-activated cell sorting (FACS).  
124 Interestingly, the sorted BFP<sup>+</sup> cells exhibited similar population growth rate to that of  
125 unsorted cultures, and the proportion of BFP<sup>+</sup> cells remained at approximately 90%  
126 throughout the astrogenic induction and glial progenitor expansion period (Figure 1E).  
127 This observation demonstrates that BFP expression can be maintained in the  
128 derivatives of LMX1A<sup>+</sup> midbrain floorplate progenitors, and that the loss of BFP<sup>+</sup> cells  
129 in the unsorted culture is likely due to their growth disadvantage compared to the  
130 derivatives of LMX1A<sup>-</sup> progenitors.

131 Our finding is unexpected and demonstrates that the regional or lineage identity of  
132 PSC-derived astrocytic cells should not be assumed merely based on the dominant  
133 regional property of their cellular origin, given that no *in vitro* fate specification  
134 paradigm is 100% efficient.

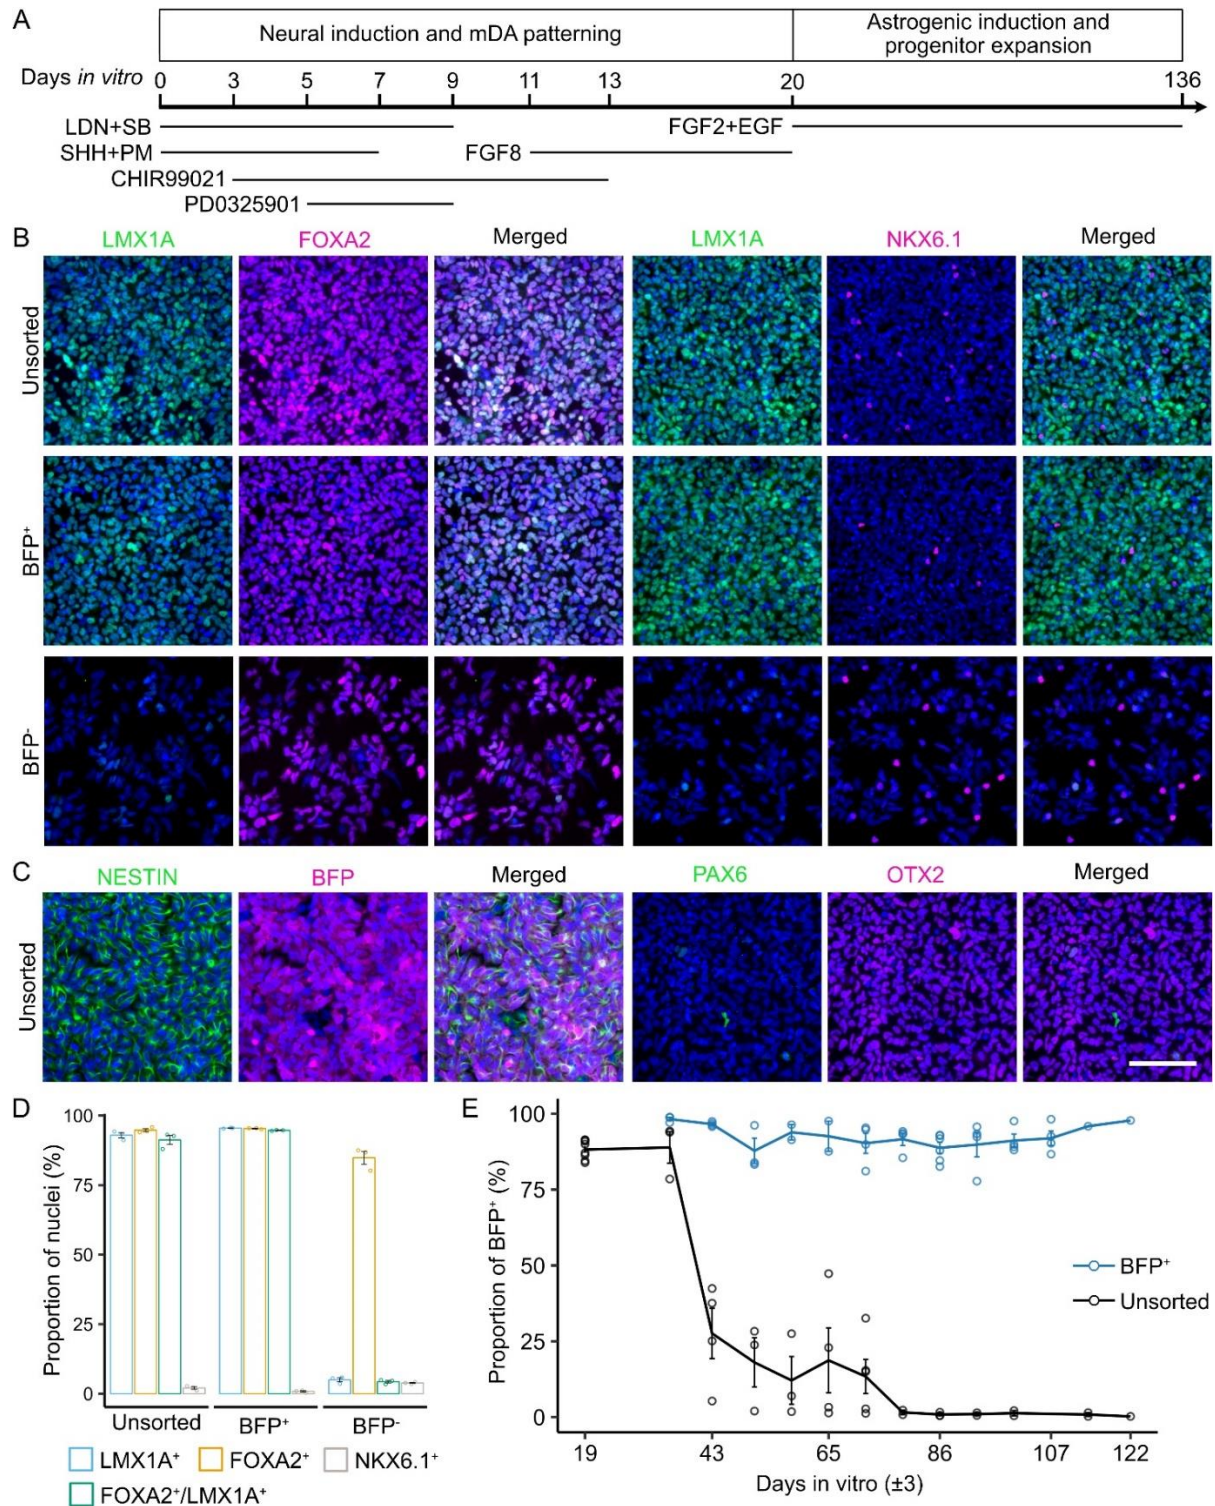

135

136

137

138

139

140

141

142

**Figure 1. Depletion of LMX1A<sup>+</sup> progenitors and their derivatives during astrogenic induction in ventral midbrain patterned neural progenitor cultures.**

A, Schematic diagram of ventral midbrain neural differentiation and astrogenic induction. B-C, Representative view of immunocytochemistry of ventral midbrain neural progenitor markers and other regional markers in d19 unsorted, sorted BFP<sup>+</sup>, and sorted BFP<sup>-</sup> population. Scale bar represents 100  $\mu$ m. Images shown were cropped to 300  $\mu$ m  $\times$  300  $\mu$ m by randomly selecting the region of interest in the nuclei-

143 only channel (uncropped greyscale images are shown in Figure S1A). D,  
144 Quantification of marker expression in unsorted, sorted BFP<sup>+</sup>, and sorted BFP<sup>-</sup>  
145 population. Error bars represent the standard error of means (SEM) of three  
146 independent experiments. E, Flow cytometry quantification of unsorted and BFP<sup>+</sup>  
147 population during astrogenic induction and progenitor expansion. Each data point  
148 represents one biological replicate. The gating strategy used is shown in Figure S1B.

149

## 150 **Astrogenic switch occurred earlier in derivatives of LMX1A<sup>+</sup>** 151 **midbrain progenitors.**

152 Since sorted BFP<sup>+</sup> (LMX1A<sup>+</sup> or their derivatives) and unsorted astrocytic cultures differ  
153 distinctively in BFP expression soon after the initiation of astrogenic induction, for  
154 simplicity, these cultures are hereafter referred to as the BFP<sup>+</sup> and BFP<sup>-</sup> cultures,  
155 respectively. Wondering whether the two cell populations behave differently in the  
156 process of astrogenic switch, we examined astrocytic marker expression in these  
157 cultures at d45 and d98 by immunocytochemistry. SOX9 and NFIA are transcription  
158 factors crucial for the initiation of astrogenesis and acquisition of astrogenic  
159 competence in the developing central nervous system (Stolt et al. 2003; Deneen et al.  
160 2006), while CD44 identifies astrocyte-restricted precursors (Liu et al. 2004). We found  
161 that all these markers were more abundantly detected in the BFP<sup>+</sup> cultures (NFIA:  
162 65.89±2.81%; SOX9: 57.19±4.25%) than the BFP<sup>-</sup> cultures (NFIA: 4.26±1.28%; SOX9:  
163 8.88±1.82%) at d45 (Two-way ANOVA with post-hoc Turkey test, NFIA:  $p=2.52\times 10^{-5}$ ,  
164 SOX9:  $p=9.21\times 10^{-6}$ ; Figure 2A-B with the original images shown in Figure S2).  
165 Although the number of NFIA<sup>+</sup> and SOX9<sup>+</sup> cells significantly increased in the BFP<sup>-</sup>  
166 cultures by d98 (NFIA: 44.07±4.56% on d98,  $p=3.58\times 10^{-4}$ ; SOX9: 44.28±2.84% on  
167 d98,  $p=1.21\times 10^{-4}$ ), the BFP<sup>+</sup> cultures still contained more cells expressing NFIA  
168 (65.71±4.25%;  $p=2.06\times 10^{-2}$ ) and SOX9 (73.25±2.12%;  $p=5.51\times 10^{-4}$ ) than BFP<sup>-</sup>  
169 cultures (Figure 2A and 2C).

170 To investigate whether the temporal difference in astrocytic switch between the BFP<sup>+</sup>  
171 and BFP<sup>-</sup> cultures affects maturation and functionality of the derived astrocytes, we  
172 initiated astrocyte terminal differentiation by exposing the BFP<sup>+</sup> and BFP<sup>-</sup> astrocyte  
173 precursors to CNTF and BMP4 (Krencik et al. 2011; Bradley et al. 2019) from d87  
174 (referred to as early astrocytes) and d136 (late astrocytes). Both BFP<sup>+</sup> and BFP<sup>-</sup>



175 cultures exhibited a similar expression profile of classic astrocyte markers, including  
176 AQP4, EAAT2, and S100B, but few GFAP<sup>+</sup> cells at both time points (Figure 2B and  
177 2D with the original images shown in Figure S3).

178 As a reference, we also generated neural progenitors without employing any  
179 patterning cues and induced astrogenic switch and astrocyte differentiation from these  
180 non-patterned neural progenitors (Figure S4A-B). We found that, while the astrocyte  
181 cultures derived from the non-patterned progenitors contained a similar proportion of  
182 cells expressing AQP4, EAAT2 and S100B compared to the BFP<sup>+</sup> and BFP<sup>-</sup> astrocyte  
183 cultures, there are more GFAP<sup>+</sup> cells in the non-patterned astrocyte preparations  
184 (17.89±5.4%, Figure S4A-B).

185 Functional astrocytes exhibit transient calcium (Ca<sup>2+</sup>) spikes upon chemical  
186 stimulation, such as ATP (Zhang et al. 2016). Using a FLIPR Ca<sup>2+</sup> release assay, we  
187 observed a sharp increase in the intracellular Ca<sup>2+</sup> concentration upon ATP  
188 administration in both the early and late BFP<sup>+</sup> astrocyte populations (early BFP<sup>+</sup>:  
189  $p=5.37 \times 10^{-12}$ ; late BFP<sup>+</sup>:  $p<2.2 \times 10^{-16}$ ; Figure 2E-F). ATP induced Ca<sup>2+</sup> release is  
190 partially mediated by inositol trisphosphate. Indeed, addition of an inositol  
191 trisphosphate receptor antagonist 2-aminoethoxydiphenylborate (2-APB) reduced the  
192 amplitude (early BFP<sup>+</sup>:  $p=5.88 \times 10^{-5}$ ; late BFP<sup>+</sup>:  $p=9.22 \times 10^{-10}$ ; Figure 2F) and rise time  
193 (early BFP<sup>+</sup>:  $p=2.63 \times 10^{-5}$ ; late BFP<sup>+</sup>:  $p=3.59 \times 10^{-4}$ ; late BFP<sup>-</sup>:  $p=0.028$ ; Figure 2G) of  
194 ATP-induced Ca<sup>2+</sup> response in both the early and late BFP<sup>+</sup> astrocytes. Interestingly,  
195 the early BFP<sup>+</sup> astrocytes had significantly lower peak amplitude than that observed  
196 in late BFP<sup>+</sup> astrocytes ( $p=6.92 \times 10^{-9}$ ; Figure 2F), despite their similar level of astrocyte  
197 marker expression, suggesting a difference in maturity at the functional level. Early  
198 and late BFP<sup>-</sup> astrocytes exhibited a similar profile of time-dependent increase in the  
199 amplitude of ATP-induced Ca<sup>2+</sup> response but did not reach statistical significance  
200 (Figure 2E-F). However, late BFP<sup>-</sup> astrocytes showed a significantly lower peak  
201 amplitude than late BFP<sup>+</sup> astrocytes ( $p<2.2 \times 10^{-16}$ ; Figure 2E-F).

202 Taken together, our data demonstrate that astrogenesis occurred earlier in BFP<sup>+</sup>  
203 cultures than BFP<sup>-</sup> cells. This temporal difference is also reflected in functional maturity  
204 of the derived astrocytes, despite a similar expression profile of classic astroglial  
205 markers.

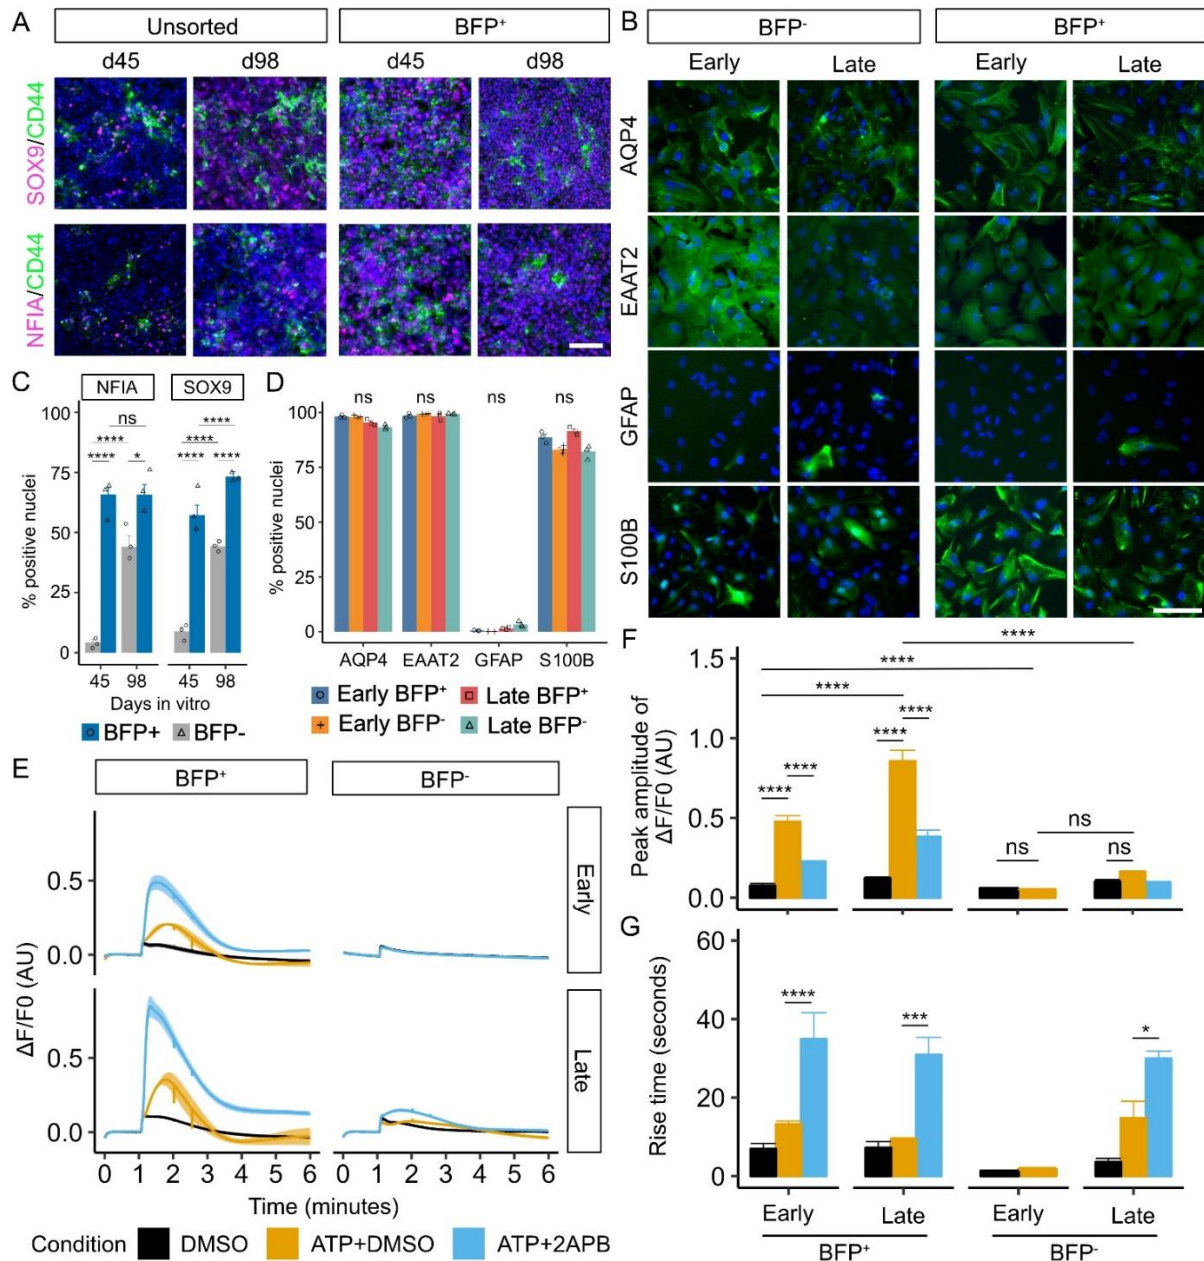

206

207

208

209

210

211

212

213

214

215

216

217

218

219

220 performed to compare between lineages (NFIA:  $p=5.389 \times 10^{-6}$ ,  $df=1$ , effect size=3.62;  
221 SOX9:  $p=1.96 \times 10^{-6}$ ,  $df=1$ , effect size=4.77) and days of differentiation (NFIA:  
222  $p=7.82 \times 10^{-5}$ ,  $df=1$ , effect size=1.99; SOX9:  $p=2.62 \times 10^{-5}$ ,  $df=1$ , effect size=2.99) D,  
223 Quantification of immunocytochemistry of astrocyte marker expression in astrocytes.  
224 Error bars represent SEM of three independent experiments. Kruskal-Wallis test  
225 results following Bonferroni correction are shown on the top of the figure (AQP4:  
226  $p.adjust=0.12$ ,  $df=3$ ,  $H=8.95$ ; EAAT2:  $p.adjust=1.00$ ,  $df=3$ ,  $H=0.95$ ; GFAP:  
227  $p.adjust=0.06$ ,  $df=3$ ,  $H=10.38$ ; S100B:  $p.adjust=0.11$ ,  $df=3$ ,  $H=9.05$ ). E, Averaged  
228 trace of ATP-induced  $Ca^{2+}$  response assayed using FLIPR. Drugs or DMSO were  
229 applied at 1 minute of the assay. The line represents the average fluorescence change  
230 ( $\Delta F/F_0$ ) in at least three independent experiments each with at least three replicate  
231 wells. The shaded area represents the SEM across at least three independent  
232 experiments. F, Quantitative comparison of the peak amplitude of ATP-induced  $Ca^{2+}$   
233 response among conditions (two-way ANOVA,  $p < 2.2 \times 10^{-16}$ ,  $df=2$ , effect size=2.54)  
234 and samples ( $p=2.87 \times 10^{-14}$ ,  $df=3$ , effect size=2.17). Error bars represent the SEM  
235 across at least independent experiments. G: Quantitative comparison of the rise time  
236 of ATP-induced  $Ca^{2+}$  response among conditions (two-way ANOVA,  $p=2.19 \times 10^{-13}$ ,  
237  $df=2$ , effect size =1.958) and samples ( $p=0.064$ ,  $df=3$ , effect size=0.76). Intergroup  
238 comparison was performed using Post-hoc Tukey test. Error bars represent the SEM  
239 across at least three independent experiments. (\*\*\*\*:  $p < 0.0001$ , \*\*\*:  $p < 0.001$ , \*\*:  $p < 0.01$ , \*:  $p < 0.05$ , ns: not significant).  
240

241

## 242 **Single cell RNA sequencing confirms the authenticity of PSC-** 243 **derived astrocytes.**

244 To further characterize the PSC-derived astrocytes, we performed full-length  
245 scRNAseq on early and late BFP<sup>+</sup> and BFP<sup>-</sup> astrocytes using the iCELL8 platform and  
246 SMART-seq technology, with non-patterned astrocytes derived from the LMX1A-  
247 Cre/AAVS1-BFP tracer line as a control. A sample of iPSC-derived neurons was  
248 included to facilitate downstream cell type identification. We profiled FACS purified  
249 astrocytes expressing CD49f as well as unsorted cultures for comparison of all three  
250 astrocyte populations (Barbar et al. 2020); Figure S4C-H). After stringent filtering  
251 (Figure S5A-C, see Methods and Materials on filtering), we obtained a total of 17478  
252 protein-coding genes in 1786 qualifying cells, with an average of 6326 protein-coding  
253 genes detected per cell.

254 Unsupervised Louvain clustering identified 12 cell clusters (Figure 3A). Cells clustered  
255 mainly based on sample type (astrocytes and neurons; Figure S6A) and the estimated  
256 cell cycle phase (Figure S6B), while sorted CD49f<sup>+</sup> and unsorted astrocytes were

257 clustered together (Figure S6A). *TagBFP* was detected at a higher level in BFP<sup>+</sup>  
258 astrocyte samples than in BFP<sup>-</sup> and NP samples, while *TagBFP* expression was  
259 negligible in the neuronal samples derived from an iPSC line without BFP transgene  
260 (Figure S6C-D). Using a set of known astrocyte and neuronal signature genes (Figure  
261 3B), we identified cells in clusters 0, 1, and 5-11 as astrocytes (Figure 3B), which were  
262 enriched in expression of *SOX9*, *NFIA*, *NFIB*, *HES1*, *S100A13*, *S100A16*, *EGFR*,  
263 *CD44* and *GJA1* (Figure 3B). These transcripts were also detected at high levels in  
264 clusters 2 and 4, which were mostly estimated to be in cell cycle phases G2, M and S  
265 (Figure S6B). In addition, clusters 2 and 4 showed high levels of proliferation-related  
266 transcripts, such as *TOP2A*, *MKI67*, *CDK1* and *AURKA* (Figure 3B), and are thus  
267 defined as astrocyte precursors. In contrast, Cluster 3 contains mostly cells from the  
268 neuronal sample (Figure 3A and Figure S6A) and indeed expressed high levels of  
269 genes closely related to neuronal structure and function (such as *STMN2*, *SYT1*, *DCX*,  
270 *MAPT*, and *SNAP25*; Figure 3B). We did not detect transcripts indicative of endoderm  
271 (*GATA4*), mesoderm (*TBXT* and *TBX6*), and oligodendrocyte progenitors (*SOX10* and  
272 *PDGFRA*) in any of these clusters (Figure S6C).

273 To determine the authenticity of these PSC-derived astrocytes, we mapped our data  
274 to published scRNAseq datasets obtained from five foetal, an adult human brain and  
275 a PSC-derived astrocyte study using Seurat integration (La Manno et al. 2016; Sloan  
276 et al. 2017; Zhong et al. 2018; Polioudakis et al. 2019; Agarwal et al. 2020; Fan et al.  
277 2020; Bhaduri et al. 2021; Eze et al. 2021). We found that cells in clusters annotated  
278 as astrocytes (clusters 0, 1, and 5-11) were indeed predominantly mapped to the  
279 reference astrocyte or astrocyte precursor populations with high confidence  
280 (prediction score over 0.5; Figure 3C and Figure S7). In contrast, neuronal cluster 2  
281 was mapped to neurons of the foetal reference datasets, while the astrocyte precursor  
282 clusters (2 and 4) were mapped to progenitor populations in the foetal reference  
283 datasets (Figure 3C and Figure S7). These findings demonstrate that our iPSC-  
284 derived astrocytes closely resemble those in the human brains.

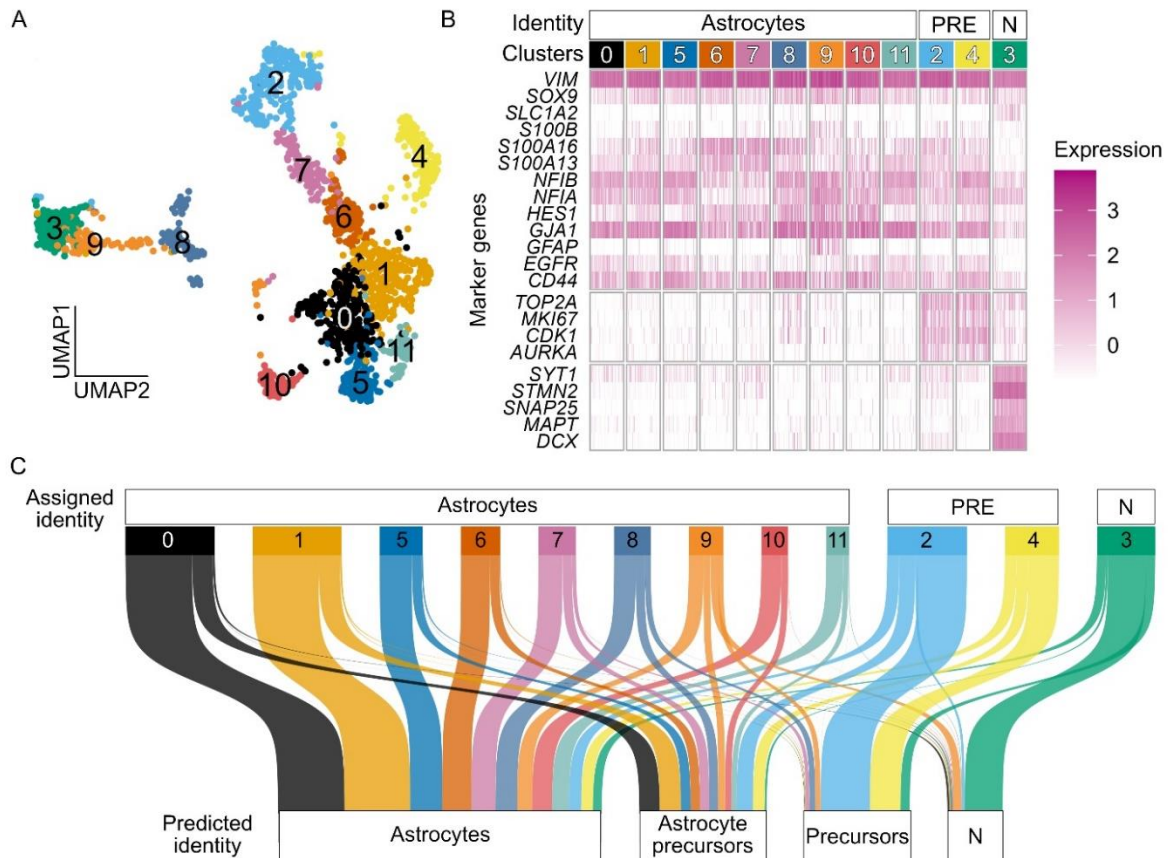

285

286 **Figure 3. Single cell RNA sequencing confirms the authenticity of PSC-derived**  
 287 **astrocytes.**

288 A, Uniform manifold approximation and projection plot of unbiased clustering, coloured  
 289 by clusters. B, Heatmap of the normalised expression of selected markers in different  
 290 clusters. The assigned identity to each cluster is shown at the top of the plot. C, Sankey  
 291 plot summarising the result of reference mapping of cells in different clusters to eight  
 292 published reference human brain scRNAseq datasets. The thickness of the thread is  
 293 proportional to the number of cells mapped to the same identity in the reference  
 294 datasets (predicted identity). Detailed results of referencing mapping to each reference  
 295 datasets are shown in Figure S7A-H and prediction score shown in Figure S7I. (PRE:  
 296 precursors; N: neurons)

297

298 **Distinct transcriptome fingerprints of LMX1A<sup>+</sup> midbrain floor plate-**  
 299 **derived astrocytes**

300 Significant advance has been made recently in understanding the molecular profiles  
 301 of midbrain dopamine neurons. However, our knowledge about midbrain astrocytes in  
 302 this regard remains limited and does not inform anatomic or lineage origin of the cells.

303 In this regard, the BFP<sup>+</sup> astrocytes provide a unique resource to determine the  
304 transcriptomic characteristics of human midbrain floor plate derived astrocytes. By  
305 performing pairwise differential gene expression (details described in Methods and  
306 Materials), we identified 1153 genes differentially expressed (DEGs; adjusted p values  
307 less than 0.05 and log<sub>2</sub> fold change over 0.25) in BFP<sup>+</sup> astrocytes when compared to  
308 either BFP<sup>-</sup> or non-patterned astrocyte populations (Supplementary Data 1). Of these,  
309 159 were unique to BFP<sup>+</sup> astrocytes (BFP<sup>+</sup> enriched, Figure 4A), which include genes  
310 associated with midbrain dopamine neuron development such as *SULF1*, *LMO3*,  
311 *NELL2*, and *RCAN2* (Figure 4B) (Strelau et al. 2000; La Manno et al. 2016; Bifsha et  
312 al. 2017; Ahmed et al. 2021). Interestingly, *LMX1A* and *FOXA2*, which was used to  
313 evaluate PSC-derived midbrain astrocytes in previous studies, were not detected in  
314 BFP<sup>+</sup> astrocytes (Figure S6D). We also identified 530 DEGs enriched in BFP<sup>-</sup>  
315 astrocytes only (BFP<sup>-</sup> enriched, Figure 4A and Supplementary Data 1), which include  
316 those known to be expressed in the ventrolateral - dorsal domain of the midbrain and  
317 hindbrain, such as *IRX3*, *IRX5*, *PAX3*, and *PAX7* (Figure 4B)(Houweling et al. 2001;  
318 Matsunaga et al. 2001). This transcription profile supports the notion that the BFP<sup>-</sup>  
319 astrocytes are descendants of the initial minor populations of lateral midbrain  
320 progenitors. Moreover, 72 DEGs were shared by BFP<sup>+</sup> and BFP<sup>-</sup> astrocytes against  
321 the non-patterned astrocytes (midbrain enriched, Figure 4A and Supplementary Data  
322 1). This set of genes includes *NR2F1*, *NR2F2*, *ZEB2*, *KCNJ6* and *SRPX* (Figure 4B),  
323 which have been reported to be signatures of mouse midbrain astrocytes (Endo et al.  
324 2022). Together, our findings provide a new entry to transcriptomic characteristics of  
325 midbrain astrocytes and specifically a gene expression map of midbrain floor plate  
326 derived human astrocyte lineage.

327 Gene ontology (GO) enrichment analysis was performed on the 1153 DEGs enriched  
328 in BFP<sup>+</sup> astrocytes (Supplementary Data 2). The significantly enriched GO terms were  
329 mainly related to various aspects of metabolism, stress response, biosynthesis,  
330 lysosomal activity, and cellular respiration (Figure 4C and Supplementary Data 3).  
331 These biological processes have previously been shown to be disrupted by several  
332 mutations causing familial Parkinson's disease (di Domenico et al. 2019; Barbuti et al.  
333 2020; Sonninen et al. 2020). In contrast, the GO terms associated with 530 BFP<sup>-</sup>  
334 astrocyte enriched DEGs were mostly related to formation of extracellular matrix and

335 tissue development (Figure 4D and Supplementary Data 2-3). The differential  
 336 enrichment of GO terms implicates functional difference between the BFP<sup>+</sup> and BFP<sup>-</sup>  
 337 astrocytes and supports the need for generating regional specific astrocytes for  
 338 disease modelling.

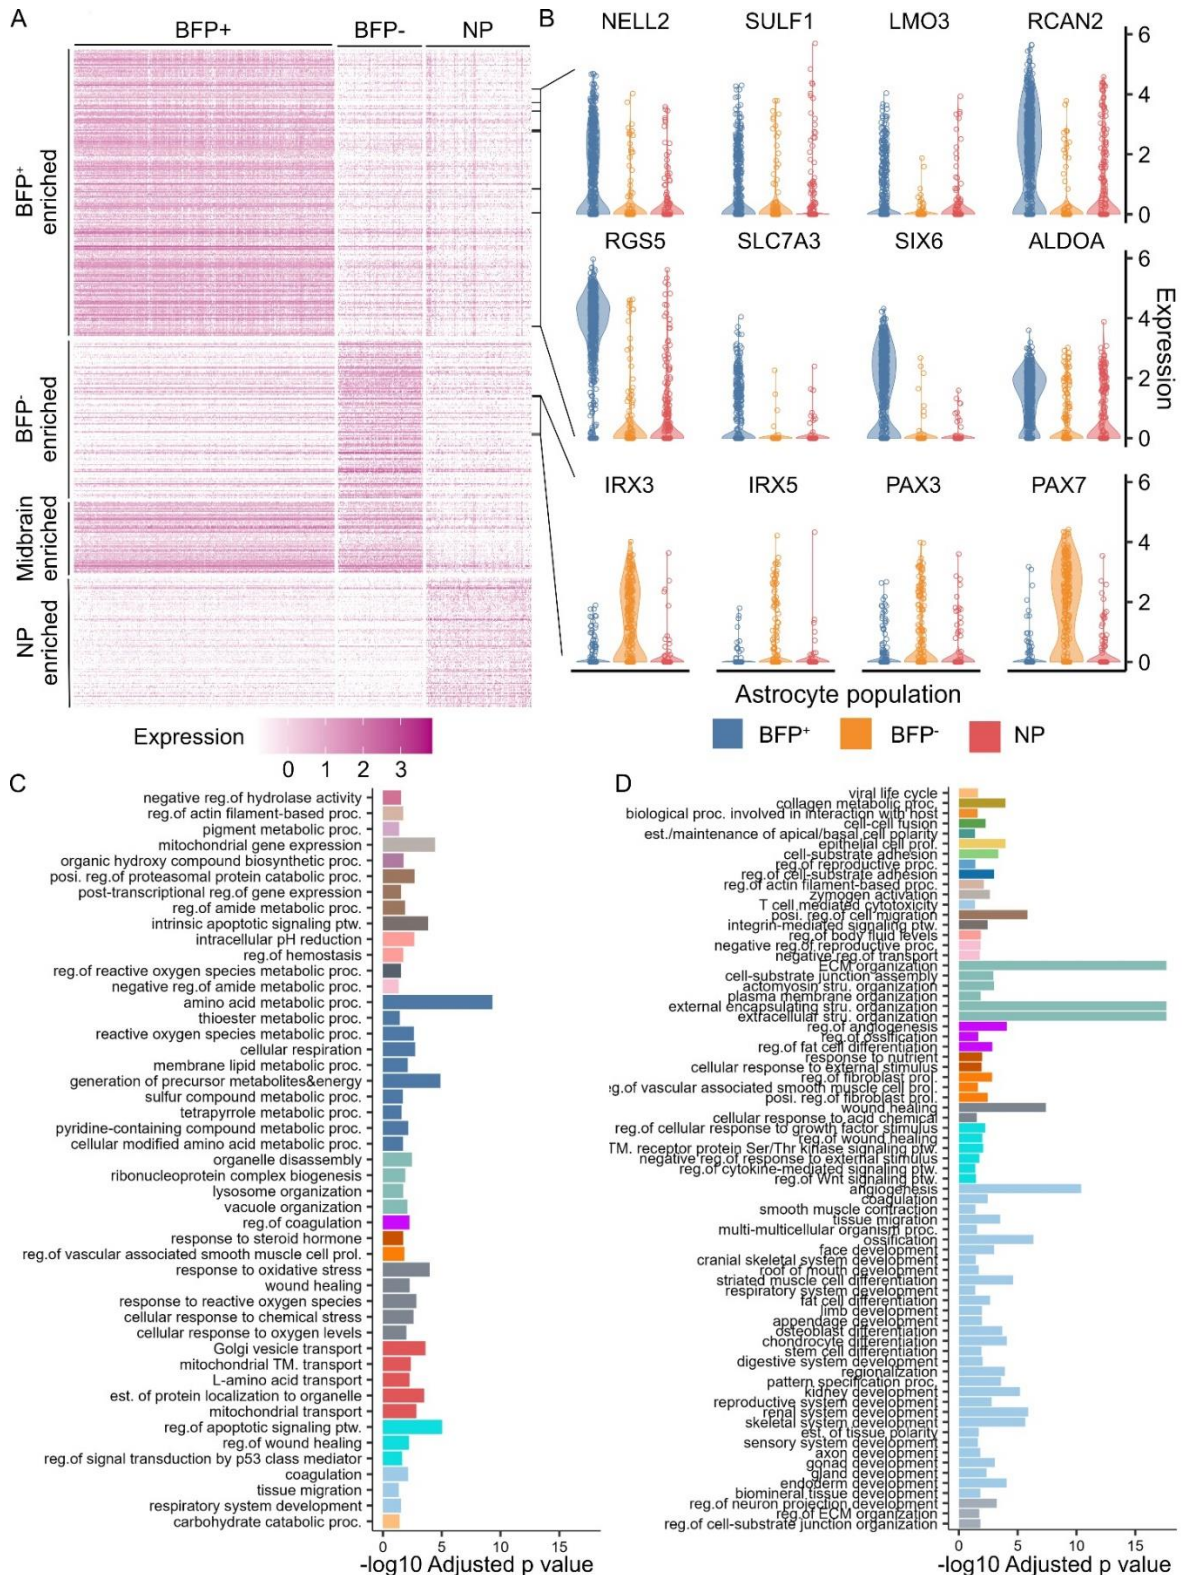

339

340 **Figure 4. Distinct transcriptome fingerprints of LMX1A<sup>+</sup> midbrain floor plate-**  
341 **derived astrocytes**

342 A, Heatmap of the normalised expression of population-specific genes in different  
343 populations of astrocytes. B, Violin plots of the normalised expression of selected  
344 candidate markers for BFP<sup>+</sup>, BFP<sup>-</sup>, and non-patterned (NP) astrocytes. C-D,  
345 Representative GO terms significantly enriched in BFP<sup>+</sup> (C) and BFP<sup>-</sup> (D) enriched  
346 genes. Semantically similar representative terms were shown with the same colour.

347

348 **Discussion**

349 Despite the general belief that recapitulating astrocyte lineage heterogeneity is  
350 necessary for stem cell-based disease modelling and cell transplantation, the extent  
351 of astrocyte heterogeneity in different brain regions and subregions remains largely  
352 elusive. By harnessing an LMX1A based lineage tracing human iPSC line and cutting  
353 edge scRNAseq technology, we show that astrocytes derived from the LMX1A<sup>+</sup>  
354 midbrain floor plate progenitors, the same cells giving rise to midbrain dopaminergic  
355 neurons, possess distinct transcriptional landmarks from those derived from non-  
356 midbrain patterned neural progenitors as well as other midbrain patterned progenitors.  
357 Moreover, we discovered unexpected negative selection against derivatives of  
358 LMX1A<sup>+</sup> progenitors during astrocyte induction and progenitor expansion. Our study  
359 highlights the need for careful characterisation of PSC-derived astrocytes and  
360 provides a transcriptomic fingerprint for midbrain floor plate derived astrocytes.

361 Using a popular astrocyte in vitro differentiation paradigm, we found that astrocytes  
362 descended from the LMX1A<sup>+</sup> midbrain progenitors could only be obtained from purified  
363 progenitors. In contrast, astrocytes derived from bulk midbrain patterned progenitors  
364 exhibits transcriptomic profiles of the lateral-dorsal midbrain, despite LMX1A<sup>+</sup> midbrain  
365 progenitors being the predominant starting population. Our findings demonstrate that  
366 the lineage composition of the parent progenitors may not be faithfully preserved  
367 during astrocyte induction and progenitor expansion. FGF is the most popular  
368 inductive molecule used for astrocyte differentiation from stem cells (Chandrasekaran  
369 et al. 2016). It is evident however that FGF expanded neural progenitors, originated  
370 either from the brain or neutralized PSCs, exhibit restricted regional competence and



371 positional gene expression. For example, bulk expanded human ventral midbrain  
372 neural progenitors (Jain et al. 2003), and fetal forebrain or spinal cord derived neural  
373 stem (NS) cells only give rise to GABAergic neurons (Sun et al. 2008); likewise, It-  
374 NES cells display anterior hindbrain-like positional profile (Falk et al. 2012), while their  
375 antecedents, PSC-derived neural rosettes and early passage derivatives, express  
376 anterior forebrain markers (Koch et al. 2009). It is not clear whether this is due to  
377 deregulation of the original patterning at the level of gene expression or the loss of  
378 associated cell population (Gabay et al. 2003). In this study, since BFP<sup>+</sup> astrocytes  
379 can be generated under the same culture condition with purified LMX1A<sup>+</sup> progenitors,  
380 we reasoned that the loss of their derivatives in unsorted cultures was possibly due to  
381 differential growth capacity.

382 Our study highlights the need for careful assessment of astrocyte positional identity.  
383 A common practice in this regard is to confirm the regional characteristics of the  
384 founder progenitors following fate directed neural induction, with the assumption that  
385 the dominant positional features will be maintained by the astrocyte progeny (Krencik  
386 et al. 2011). This strategy is at least partly dictated by our limited knowledge in gene  
387 expression signatures of regional- and/or lineage-specific astrocytes. Hence, an end  
388 point evaluation of PSC-derived astrocytes often relies on region-specific markers  
389 defined in the developmental brain during the neurogenic period. For example, LMX1A  
390 and FOXA2 expression were used as criteria for midbrain astrocytes in previous  
391 studies (Barbuti et al. 2020; Crompton et al. 2023). However, scRNAseq of human  
392 fetal ventral midbrain and adult substantia nigra revealed negligible expression of  
393 these transcripts in astrocytes (La Manno et al. 2016; Agarwal et al. 2020; Kamath et  
394 al. 2022). Consistent with these findings, we did not detect LMX1A or FOXA2 in neither  
395 the BFP<sup>+</sup> nor BFP<sup>-</sup> astrocytes. Our analysis however identified new positive and  
396 negative markers that could be applied to confirm the regional identity of ventral  
397 midbrain astrocytes.

398 In addition to distinct transcriptomic profile, BFP<sup>+</sup> and BFP<sup>-</sup> astrocytes may also be  
399 functionally different. Astrocytes generated from progenitors broadly patterned to the  
400 dorsal forebrain, ventral forebrain and spinal cord have been shown to exhibiting  
401 different GO enrichment profile as well as different physiological and functional  
402 properties (Bradley et al. 2019). In comparison to the BFP<sup>-</sup> and non-patterned

403 astrocytes, the current study revealed that GO terms enriched in BFP<sup>+</sup> astrocytes,  
404 which originated from the same progenitor giving rise to midbrain dopaminergic  
405 neurons, were closely related to various biological processes disrupted in astrocytes  
406 carrying familial Parkinson's disease mutations (di Domenico et al. 2019; Barbuti et al.  
407 2020; Sonninen et al. 2020). Such a distinct enrichment profile implicates BFP<sup>+</sup>  
408 astrocytes being functionally adapted to supporting midbrain dopaminergic neurons  
409 compared to BFP<sup>-</sup> and non-patterned astrocytes.

410 In conclusion, this study lends further support on regional diversity of astrocytes and  
411 identified a set of midbrain enriched genes. Crucially, the transcriptomic fingerprint of  
412 human midbrain floor plate-derived astrocytes described here offers a much-needed  
413 resource for assessing the authenticity of stem cell derived astrocytes in studies  
414 associated with Parkinson's disease.

## 415 **Methods and Materials**

### 416 **Stem cell culture and astrocyte differentiation**

417 KOLF2 human iPSCs were maintained in E8 flex media (ThermoFisher) and manually  
418 dissociated using Gentle Cell Dissociation Reagent (STEMCELL Technologies) as  
419 previously described (Cardo et al. 2023). Astrocytes were differentiated using a three-  
420 stage stepwise strategy consisting neural induction and regional patterning, astrogenic  
421 switch and progenitor expansion, and astrocyte terminal differentiation. Midbrain floor  
422 plate progenitors were generated as previously described (Cardo et al. 2023). At day  
423 19, cells were replated as single cells onto poly-D-lysine-laminin-coated plates at  
424  $1 \times 10^6$  cells/cm<sup>2</sup> for astrogenic switch and progenitor expansion in N2B27 media  
425 supplemented with 10 ng/mL FGF2 (Peprotech) and 10 ng/mL Human EGF  
426 (Peprotech) and replated every 6-8 days. For astrocyte terminal differentiation,  
427 expanded neural progenitors were re-plated at a density of  $3 \times 10^4$  cells/cm<sup>2</sup> in  
428 expansion media and 24 hours later switched to N2B27 supplemented with 10 ng/mL  
429 human recombinant CNTF (Peprotech) and 10 ng/mL human recombinant BMP4  
430 (Peprotech) for 7 days followed by media containing CNTF alone for another 13 days.  
431 10  $\mu$ M Y-27632 was used for 24 hours before and after each replating. The protocol

432 for generating non-patterned astrocytes was the same as for floor plate-derived  
433 astrocyte except the neural progenitors were derived with duo-SMAD inhibitors only  
434 without ventral patterning reagents.

### 435 **Flow cytometry analysis and cell isolation**

436 Cells were dissociated in Accutase as described above and washed twice with DPBS  
437 by centrifugation for 5 minutes at 200 rcf. For evaluating BFP expression, dissociated  
438 cells were resuspended in 0.5 mM EDTA in DPBS (Sigma-Aldrich) and analysed on a  
439 BD LSRFortessa cell analyser (BD Biosciences). For purifying BFP<sup>+</sup> cells, dissociated  
440 cells were resuspended in the same cell culture media. Background autofluorescence  
441 was compensated for using KOLF2 parental cell line at a similar stage of differentiation  
442 to define BFP<sup>-</sup> gating. For purifying CD49f<sup>+</sup> astrocytes, dissociated cells were stained  
443 with Alexa Fluor 647-conjugated rat anti-CD49f antibody (5% v/v in a 100 µL reaction;  
444 BD Biosciences) for 25 minutes at 37°C on an orbital shaker at 200 rcf and  
445 resuspended in DPBS containing 0.5% bovine serum albumin and 50 units/mL DNase  
446 I (Sigma Aldrich). Background autofluorescence was compensated for using KOLF2  
447 parental cell line at a similar stage of differentiation to define BFP<sup>-</sup> gating and unstained  
448 astrocytes to define CD49f<sup>-</sup> gating. Cell sorting was performed on a BD FACSAria III  
449 (BD Biosciences) using an 80 µm nozzle. Sorted cells were collected in the same  
450 media as for resuspension. Flow cytometry data were analysed in FlowJo v10.8.1 (BD  
451 Biosciences) as shown in Figure S1B-E. Briefly, non-debris events were selected  
452 using the eclipse gates on dot graphs of SSC-A versus FSC-A. Singlet events were  
453 sequentially gated using polygonal gates on dot graphs of FSC-H versus FSC-A and  
454 SSC-H versus SSC-A by selecting the events in the diagonal region. The positive and  
455 negative gates in the fluorescence channel were set as bifurcate gates at a minimum  
456 of 99.9% percentile (usually at 99.99% percentile) on the histogram of the  
457 fluorescence intensity of the negative control sample of the same flow cytometry  
458 experiment and applied to all samples of the same flow cytometry experiment.

### 459 **Immunocytochemistry**

460 Cultures were fixed with 3.7% PFA for 15-20 min at 4 °C. For nuclear antigen  
461 detection, an additional fixation with methanol gradient was performed, which include

462 5 mins each in 33% and 66% methanol at room temperature followed by 100%  
463 methanol for 20 min at -20°C. Cultures were then returned to PBST via inverse  
464 gradient and were then permeabilized with three 10-minute washes in 0.3% Triton-X-  
465 100 in PBS (PBS-T) and then blocked in PBS-T containing 1% BSA and 3% donkey  
466 serum. Cells were incubated with primary antibodies in blocking solution overnight at  
467 4°C. Following three PBS-T washes, Alexa-Fluor secondary antibodies (Thermo  
468 Fisher Scientific) were added at 1:1000 PBS-T for 1 hour at ambient temperature in  
469 the dark. Three PBS-T washes were then performed that included once with DAPI  
470 (Molecular Probes). Images were taken on a Leica DMI6000B inverted microscope.  
471 Quantification was carried out in Cell Profiler (Stirling et al. 2021) or manually using  
472 ImageJ (Schindelin et al. 2012) by examining at least four randomly selected fields  
473 from three independent experiments. The antibodies used are provided in the  
474 Supplementary Table 1. Representative images shown in main figures were cropped  
475 by randomly selecting the region of interest in the DAPI-stained channel only, with the  
476 original unedited images shown in Figure S1A, S2 and S3.

## 477 **Single-cell RNA-sequencing**

478 Cells were dissociated with Accutase with 10 units/mL of papain (Sigma-Aldrich) for  
479 10 minutes at 37°C and resuspended in 0.5% bovine serum albumin (Sigma Aldrich)  
480 with 50 units/mL DNase I in DPBS without calcium or magnesium (Gibco) and passed  
481 through a cell strainer with 35 µm mesh. Cells were stained with 1 µM SYTO16  
482 (Invitrogen) and 0.08% (v/v) propidium iodide (part of the Invitrogen ReadyProbes™  
483 Cell Viability Imaging Kit, Blue/Red) for 20 minutes on ice and then dispensed into the  
484 nano-well plates of the ICELL8® cx Single-Cell System (Takara). Wells containing  
485 single viable cells were automatically selected using the ICELL8 cx CellSelect v2.5  
486 Software (Takara) with the green and not red logic. Manual triage was performed to  
487 recover additional candidate wells that contain viable single cells. The library for  
488 sequencing was then prepared using the SMART-Seq ICELL8 application kit (Takara)  
489 following the manufacturer's recommended protocol. Next-generation sequencing was  
490 performed using the NovaSeq6000 and the Xp Workflow on a S4 flow cell for 200  
491 cycles of pair-end sequencing.

## 492 **Single-cell RNA-sequencing analysis**

493 Using the Cogent NGS Analysis Pipeline software v 1.5.1 (Takara), FASTQ files  
494 containing all indices for each chip were demultiplexed to FASTQ files containing one  
495 index per file. Adaptor sequences were removed using cutadapt 3.2 with the following  
496 settings: -m 15 --trim-n --max-n 0.7 -q 20. Trimmed FASTQ files were aligned to the  
497 *Homo sapiens* GRCh38.106 primary assembly with the BFP reporter gene attached  
498 to the end of the genome, using STAR 2.7.9a (Dobin et al. 2013) with the following  
499 settings: --outSAMtype BAM Unsorted --quantMode TranscriptomeSAM --  
500 outReadsUnmapped Fastx --outSAMstrandField intronMotif --chimSegmentMin 12 --  
501 chimJunctionOverhangMin 8 --chimOutJunctionFormat 1 --alignSJDBoverhangMin 10  
502 --alignMatesGapMax 100000 --alignIntronMax 100000 --alignSJstitchMismatchNmax  
503 5 -1 5 5 --chimMultimapScoreRange 3 --chimScoreJunctionNonGTAG -4 --  
504 chimMultimapNmax 20 --chimNonchimScoreDropMin 10 --peOverlapNbasesMin 12 -  
505 -peOverlapMMp 0.1 --alignInsertionFlush Right --  
506 alignSplicedMateMapLminOverLmate 0 --alignSplicedMateMapLmin 30. After  
507 alignment, gene-level quantification was performed using featureCounts from subread  
508 2.0.0 (Liao et al. 2013) with the following settings: -t exon --primary -R CORE -F GTF  
509 -Q 0 -B -g gene\_id. The count matrix of each index was combined in R 4.2.0 (Team  
510 2023).

511 All downstream analysis was performed in R 4.3.0 using Seurat 4.3.0 (Stuart et al.  
512 2019). Gene-level filtering was applied by including only protein-coding genes with at  
513 least five total counts across all cells and being expressed in at least 1% of all cells.  
514 Poor quality cells were then identified using the *is.outlier* function from the scater  
515 1.28.0 (McCarthy et al. 2017). Poor quality cells were defined as having a high  
516 percentage of mitochondrial gene count, or high or low the total number of genes  
517 detected, or high total gene counts. The thresholds of each metrics for each sample  
518 were determined as twice the median absolute deviation of the sample. Raw gene  
519 counts were log normalised with a scale.factor setting of  $1 \times 10^5$ . Data from the two  
520 batches of experiments were integrated using the *FindIntegrationAnchors* and  
521 *IntegrateData* based on the common top 2000 highly variable genes and the first 30  
522 dimensions of principal components. The percentage of mitochondrial gene count and

523 total gene count were regressed out using the *ScaleData* function. Principal  
524 component analysis (PCA) was performed on the top 2000 high variable genes and  
525 the number of principal components used for uniform manifold approximation and  
526 projection (UMAP) was determined using the JackStraw method (Chung and Storey  
527 2015). UMAP and unbiased Louvain clustering was performed on the first 33 principal  
528 components. Pairwise differential gene expression analysis was performed using the  
529 MAST method (Finak et al. 2015) with “Chip” as the latent variable. Gene ontology  
530 enrichment analysis was performed using *enrichGO* function in the clusterProfiler  
531 4.10.0 package (Stirling et al. 2021) with all genes in the filtered dataset as the  
532 background. GO term database was downloaded using the org.Hs.eg.db 3.18.0  
533 package (Carlson 2019). Revigo v1.8.1 was used to group the representative GO  
534 terms based on semantic similarity using a size setting of 0.5, Homo sapiens  
535 database, and SimRel method for semantic similarity (Schlicker et al. 2006; Supek et  
536 al. 2011).

537 Published datasets were downloaded from NCBI’s Gene Expression Omnibus  
538 (Clough and Barrett 2016) and processed in R 4.2.0. Gene level filtering was  
539 performed by retaining only protein-coding genes with more than five total counts  
540 across all cells. Gene counts were normalised using the *NormalizeData* function  
541 (scale.factor settings are listed in Supplementary Table 2). PCA was performed based  
542 on the top 2000 highly variable genes to obtain the first 50 PCs. Visual inspection of  
543 the elbow plot was used to determine the number of PCs for downstream analysis.  
544 Batch effect between subjects was evaluated on the two-dimensional PC2~PC1 plot.  
545 Where inter-subject batch effect was observed, Harmony integration was performed  
546 based on the PCs selected in the previous step (Supplementary Table 2). UMAP was  
547 performed based on either the PCA or Harmony reduction (using the top 30  
548 dimensions), and Louvain clustering was performed (settings shown in Supplementary  
549 Table 2). Cluster identities were verified against the reported annotation where  
550 possible. For datasets without detailed annotation published or astrocyte lineage  
551 reported (Supplementary Table 2), reannotation was performed based on the  
552 expression of known markers (Figure S7A-E). Reference mapping was performed  
553 using *FindTransferAnchors* and *TransferData* function in Seurat based on the first 30  
554 dimensions of either the PCA or Harmony loadings of the reference dataset.

## 555 **Statistical analyses**

556 All data were collected from at least three independent experiments and presented as  
557 mean  $\pm$  standard error of means unless otherwise specified. Data were tested for  
558 normality with the Shapiro-Wilk test and for equal variance with Levene test before  
559 performing statistical analyses by two-way ANOVA with post-hoc Tukey test for  
560 multiple comparisons where relevant. Kruskal-Wallis test with post-hoc Dunn's test for  
561 pairwise comparison was used where parametric test was not suitable. Effect size was  
562 calculated as Cohen's  $f$  for ANOVA or eta squared based on the H-statistic for Kruskal-  
563 Wallis test. All statistical tests were performed in R4.3.0.

## 564 Supplementary Information

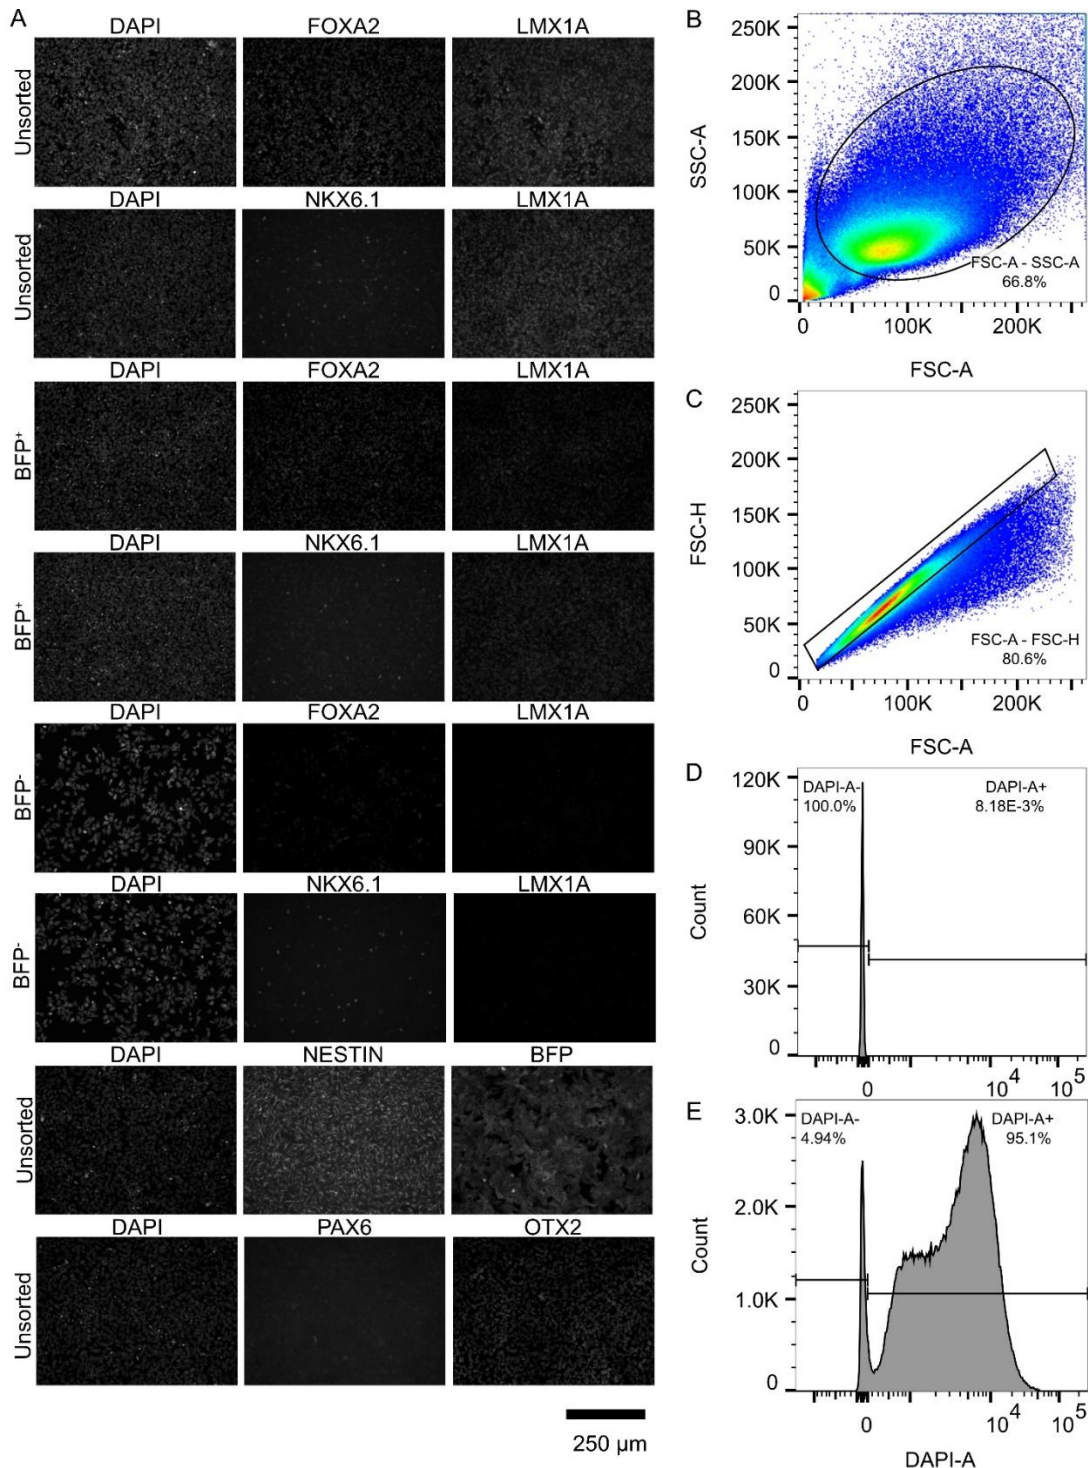

565

566 **Figure S1. Original images of immunocytochemistry of d19 progenitors and**  
567 **gating strategy of BFP flow cytometry analysis.**

568 A, the original images shown in Figure 1B-C. The gating strategy used for BFP flow  
569 cytometry analysis are shown in B-E and described in Methods and Materials. B,



570 scatter plot of SSC-A versus FSC-A. C, scatter plot of FSC-H versus FSC-A. D-E,  
571 histogram of BFP fluorescence in the negative control (D) and BFP-expressing (E)  
572 samples.

573

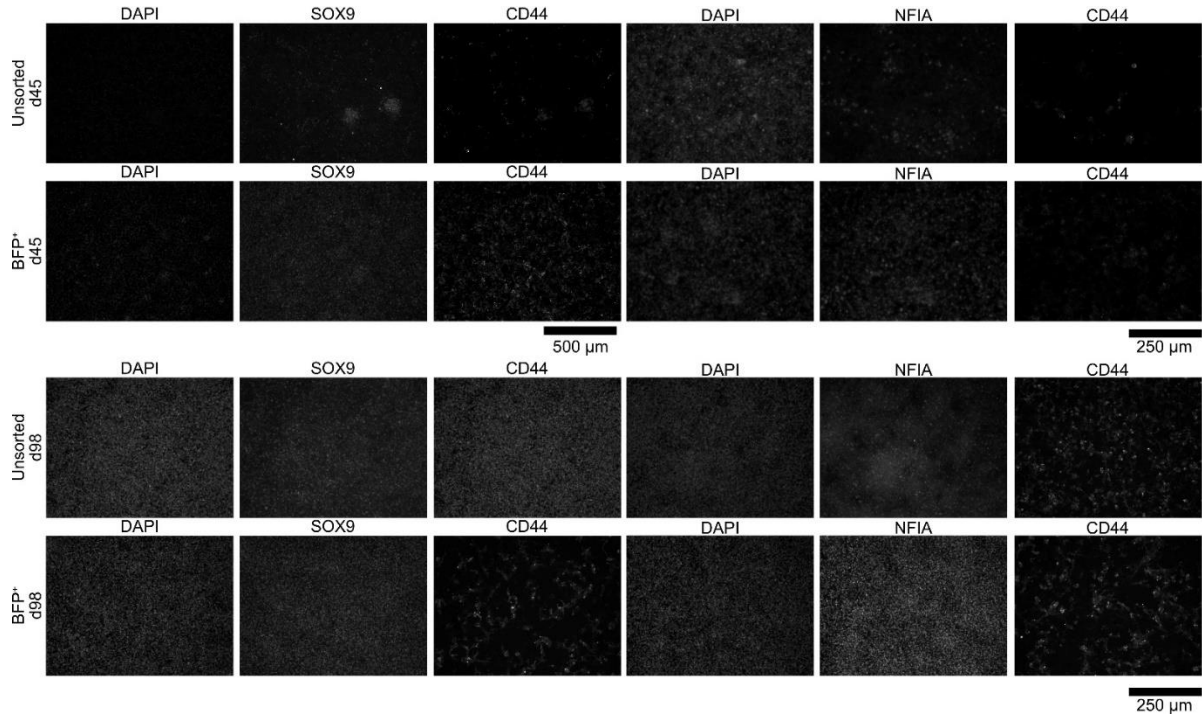

574

575 **Figure S2. Original images of immunocytochemistry of astrogenic markers**

576 **shown in Figure 2A.**

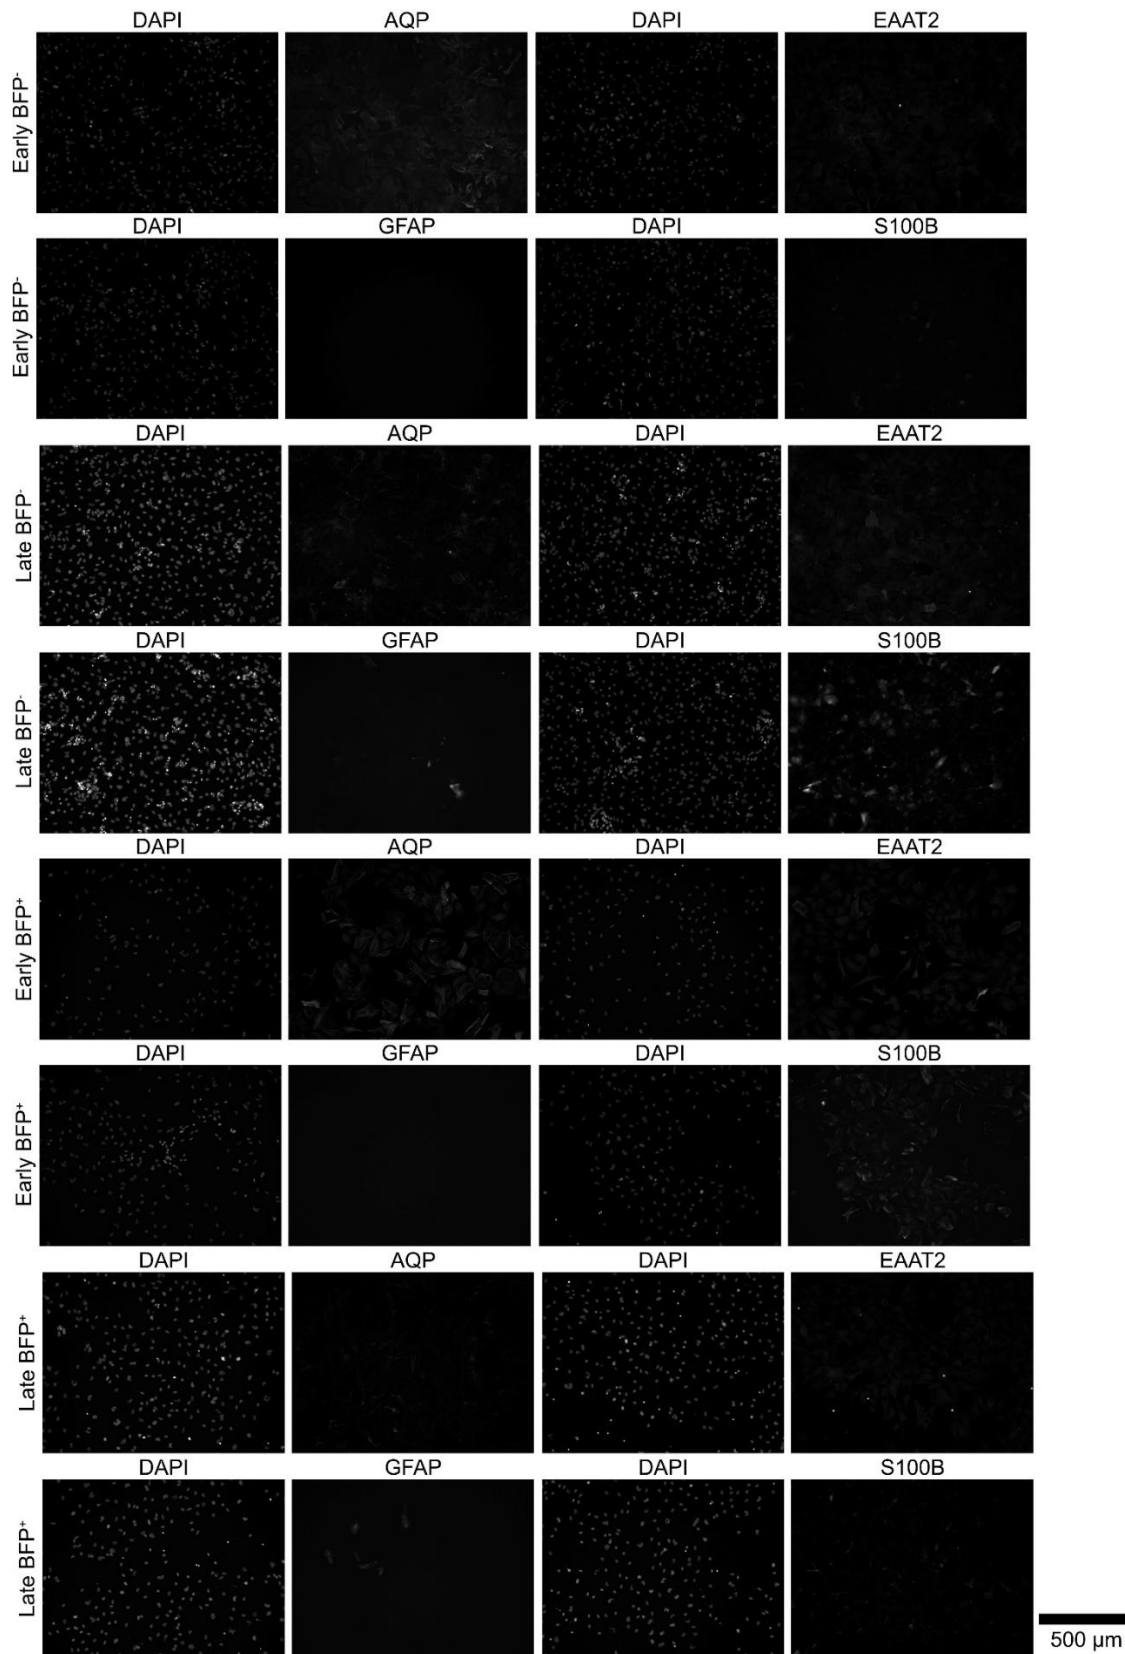

577

578 **Figure S3. Original images of immunocytochemistry of astrocyte markers**

579 **shown in Figure 2B.**

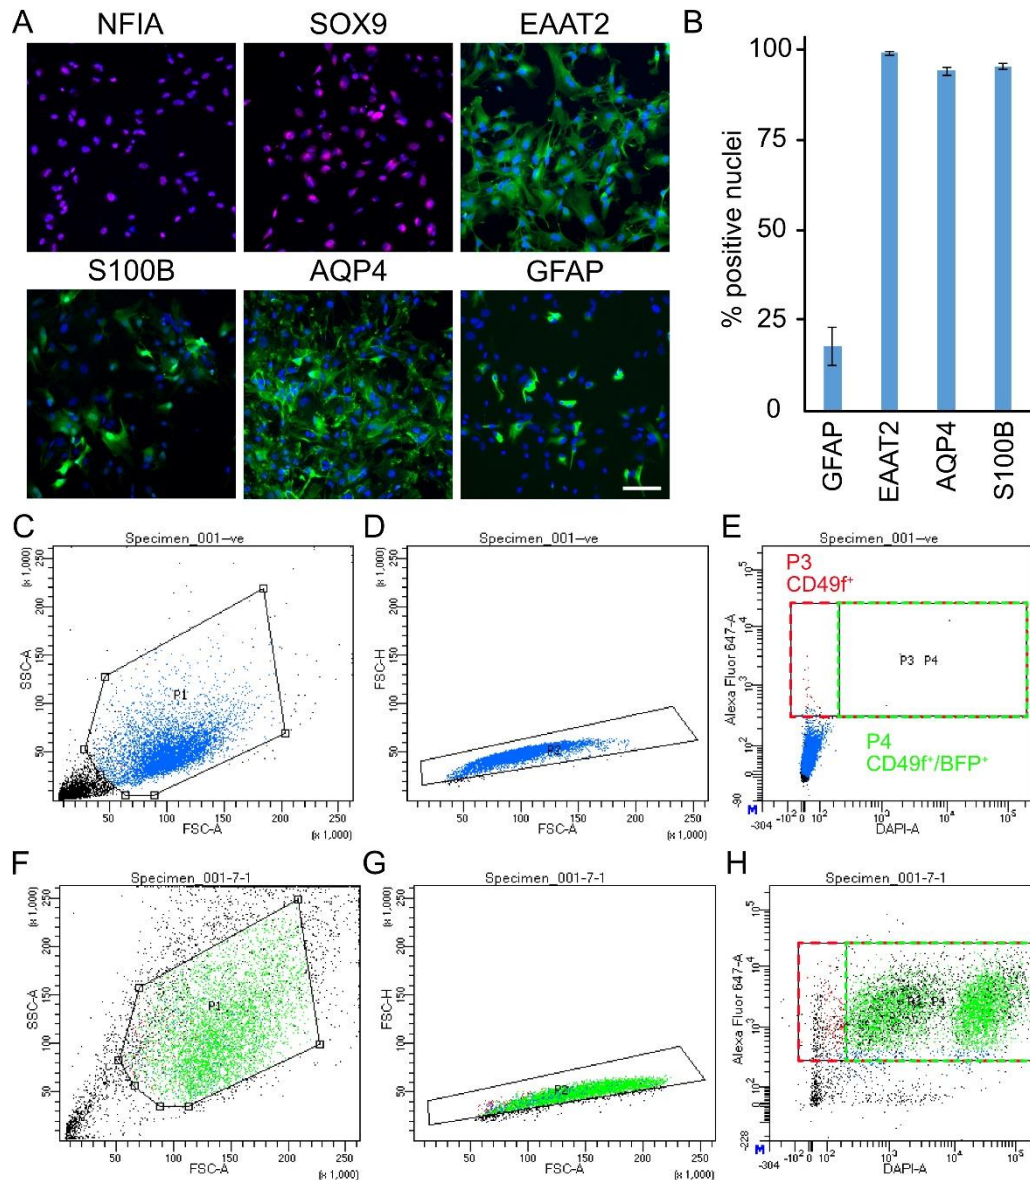

580

581 **Figure S4. Non-patterned astrocytes and fluorescence-activated cell sorting of**  
582 **astrocytes for single cell RNA sequencing.**

583 A, Representative view of immunocytochemistry of astrocyte marker expression in  
584 non-patterned astrocytes (scale bar represents 100  $\mu$ m). B, Quantification of astrocyte  
585 marker expression in astrocytes. Error bars represent SEM of three independent  
586 experiments. C-E, negative control samples; F-H, one sample of BFP+ astrocytes). C  
587 and F shows the dot plot of SSC-A versus FSC-A. D and G shows the dot plot of FSC-  
588 H versus FSC-A. E and H shows the dot plot of Alexa Fluor-647-A (labelling CD49f)  
589 versus DAPI-A (labelling BFP). P3 was used to isolate CD49f<sup>+</sup> population (including  
590 both BFP<sup>+</sup> and BFP<sup>-</sup>), while P4 was used to isolate CD49f<sup>+</sup>/BFP<sup>+</sup> population.

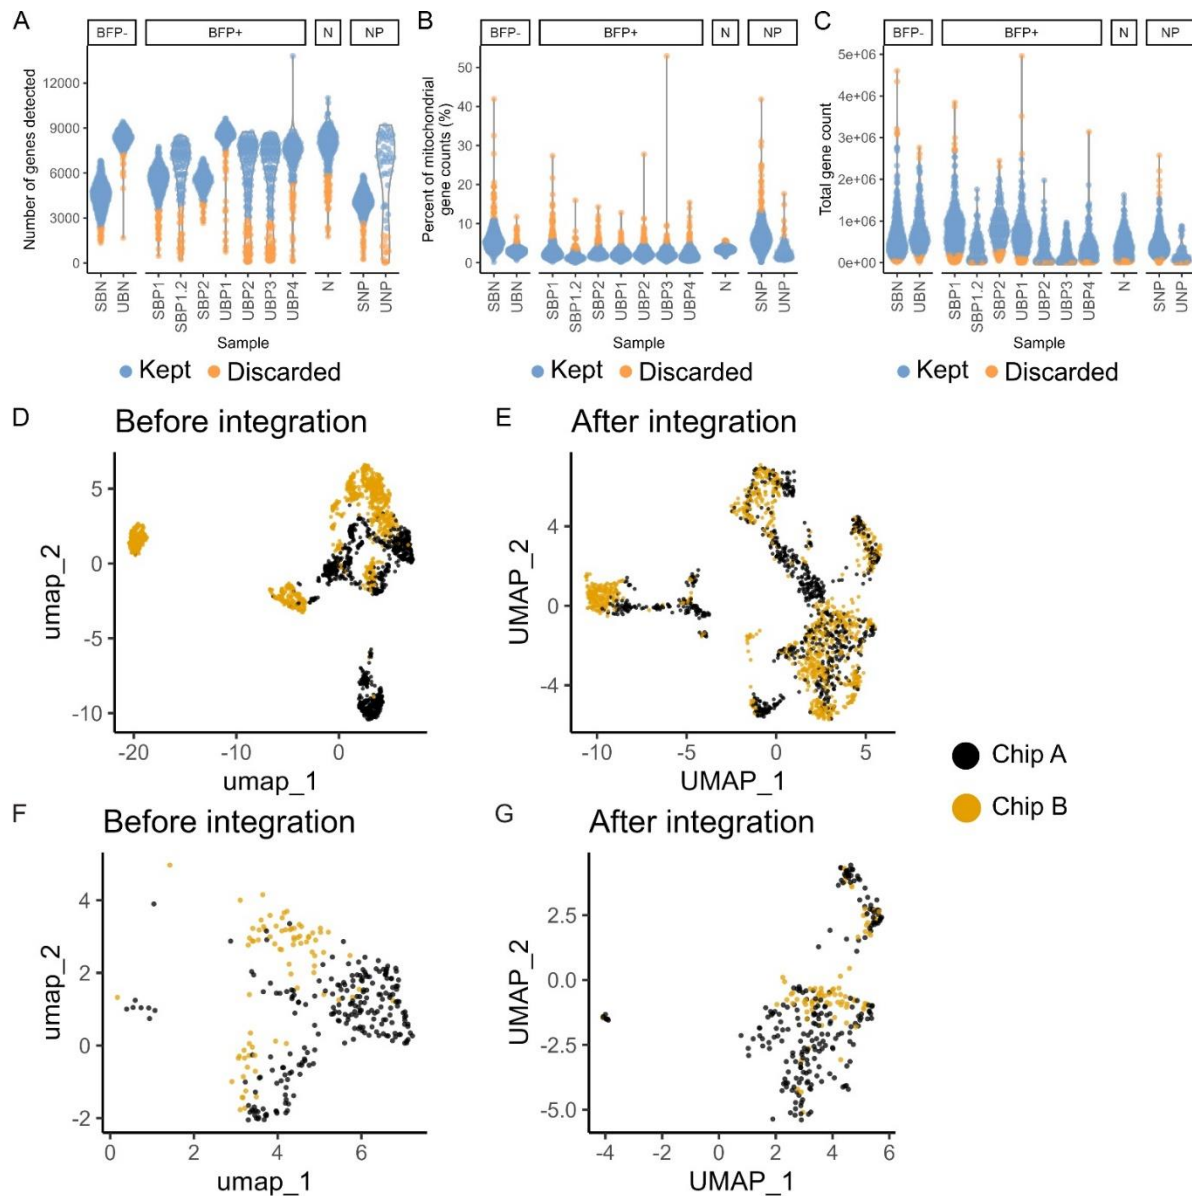

591

592 **Figure S5. Processing of single cell RNA sequencing data.**

593 A-C, Violin plots showing the results of adaptive cell-level filtering based on the  
594 number of genes detected per cell (A), percentage of mitochondrial gene counts per  
595 cell (B), and total gene count per cell (C). D-E, UMAP plot of all filtered cells before  
596 (D) and after integration (E) coloured by chip. F-G, UMAP plot of the subset of sorted  
597 BFP+ astrocytes on Chip A and B derived from the same astrocyte differentiation  
598 before (F) and after integration (G) coloured by chip. (N: neuron; SBN: sorted BFP-;  
599 SBP: sorted BFP+; SNP: sorted non-patterned; UBN: unsorted BFP-; UBP: unsorted  
600 BFP+; UNP: unsorted non-patterned; numbers represent independent samples)

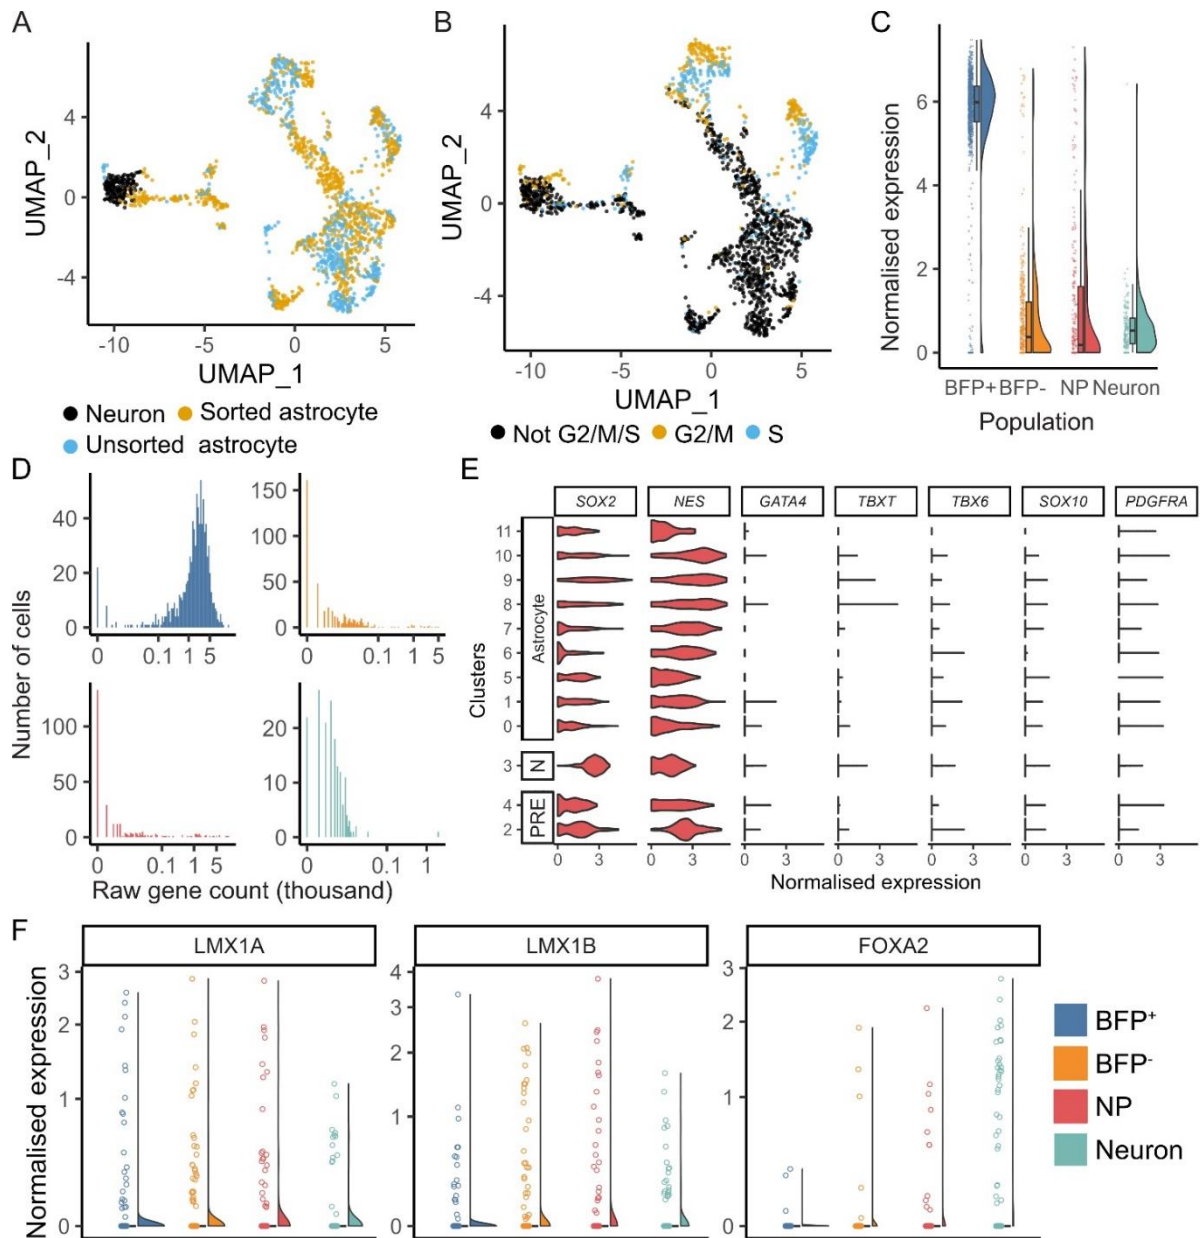

601

602 **Figure S6. Marker expression in scRNAseq.**

603 A-B, UMAP plot of all filtered cells after integration coloured by sample type and sorting  
 604 status (A) and estimated cell cycle phase (B). C, Raincloud plots of normalised  
 605 expression of *BFP*. D, Histogram of the distribution of raw gene count of *BFP*. E, Violin  
 606 plots of the normalised expression of endoderm, mesoderm, neuroectoderm, and  
 607 oligodendrocyte progenitor markers. F, Violin plots of the normalised expression of  
 608 classic ventral midbrain markers.

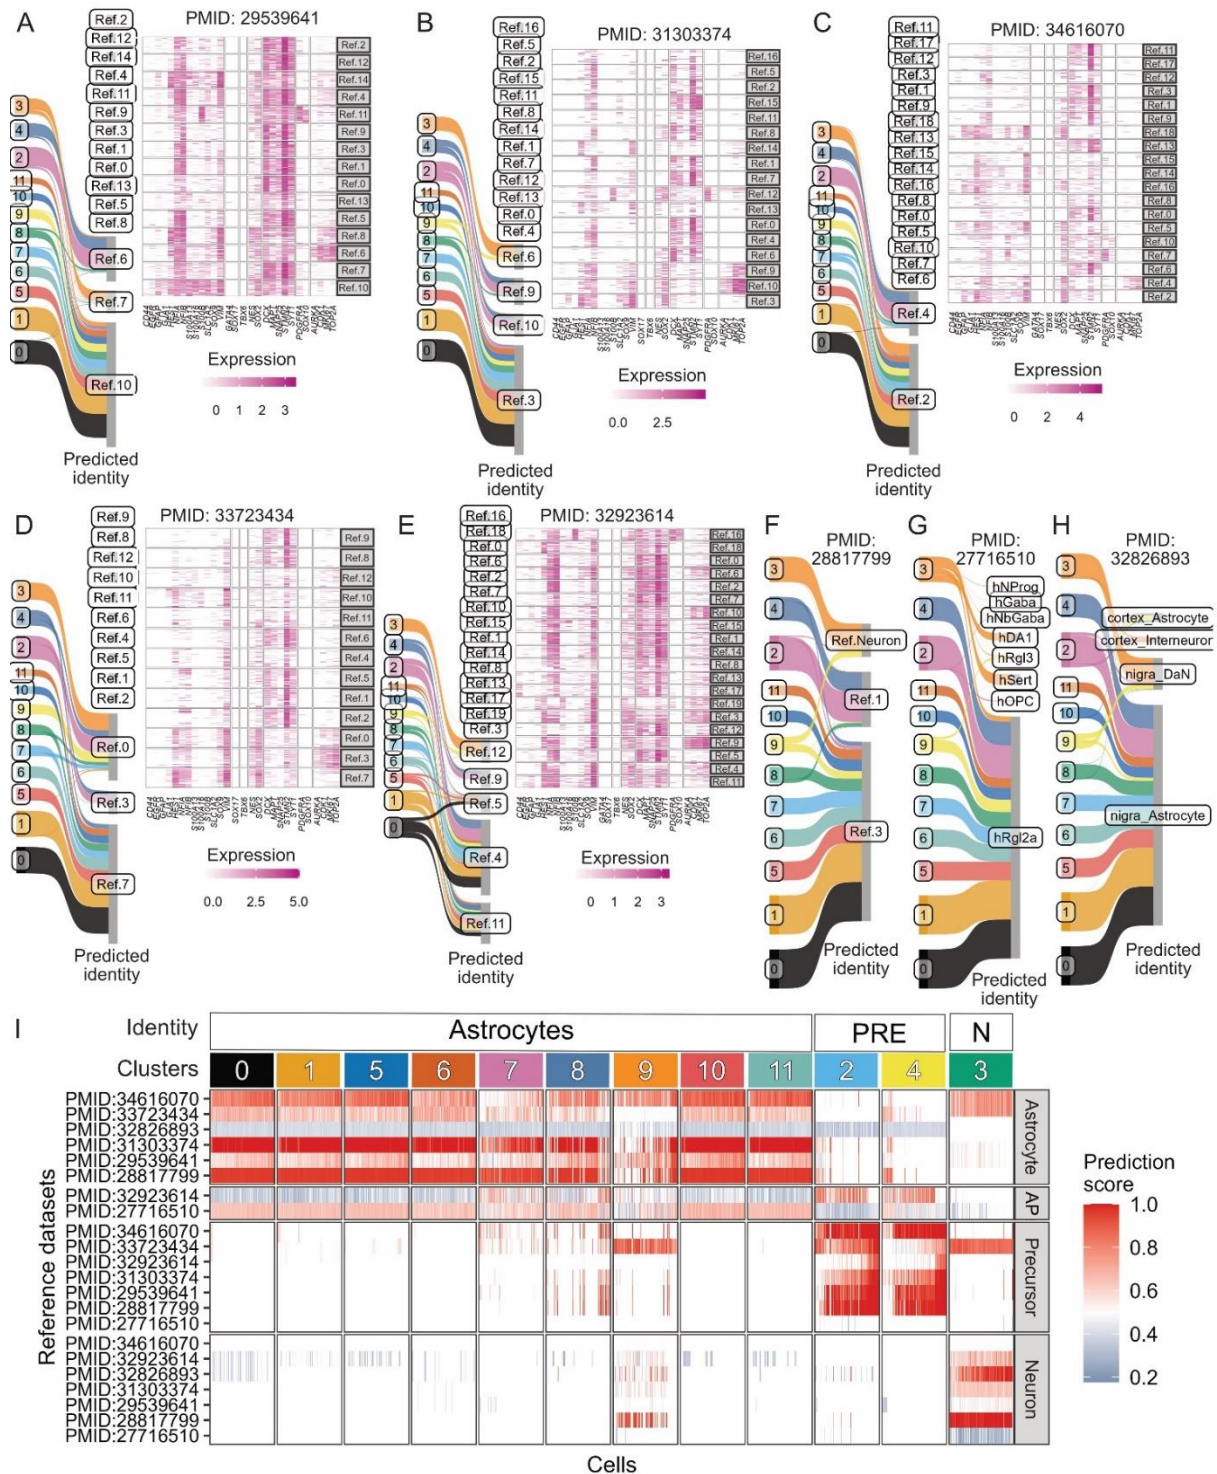

609

610 **Figure S7. Reference mapping to human brain single cell RNA sequencing**

611 **datasets.**

612 A-H, Sankey plot summarising the result of reference mapping of cells in different

613 clusters to eight published reference human brain scRNAseq datasets. The thickness

614 of the thread is proportional to the number of cells mapped to the same identity in the

615 reference datasets (predicted identity). Cluster IDs in this study are shown on the left.  
 616 Heatmap in Panel A-E shows the expression of marker genes in different clusters in  
 617 the re-annotated reference datasets. I, Heatmap of prediction score from Seurat  
 618 integration.

619

620 **Supplementary Table 1. Antibodies used in this study.**

| Target                         | Species | Producer                   | Catalogue number | Dilution for use |
|--------------------------------|---------|----------------------------|------------------|------------------|
| ALDH1L1                        | MS      | Abcam                      | ab56777          | 1:500            |
| AQP4                           | RB      | Abcam                      | ab259318         | 1:200            |
| BFP                            | rabbit  | Evrogen                    | AB233            | 1:3000           |
| CD44                           | mouse   | Cell Signalling Technology | 3750             | 1:400            |
| EAAT2                          | goat    | Abcam                      | ab235202         | 1:200            |
| FOXA2                          | goat    | R&D system                 | AF2400           | 1:1000           |
| GFAP                           | rat     | Life Tech                  | AB10533          | 1:1000           |
| LMX1A                          | rabbit  | Millipore                  | HPA030088        | 1:2000           |
| NESTIN                         | mouse   | BD                         | BD611659         | 1:300            |
| NFIA                           | rabbit  | Abcam                      | AB228897         | 1:1000           |
| NKX6.1                         | mouse   | DSHB                       | F55A10           | 1:100            |
| OTX2                           | goat    | R&D system                 | AF1979           | 1:200            |
| PAX6                           | mouse   | DSHB                       | PAX6             | 1:1000           |
| S100B                          | rabbit  | Abcam                      | ab52642          | 1:1000           |
| SOX9                           | goat    | R&D system                 | AF3075           | 1:300            |
| Anti-Goat IgG, Alexa Fluor 488 | donkey  | Invitrogen                 | A32814           | 1:1000           |
| Anti-Goat IgG, Alexa Fluor 555 | donkey  | Invitrogen                 | A32816           | 1:1000           |
| Anti-Goat IgG, Alexa Fluor 647 | donkey  | Invitrogen                 | A32849           | 1:1000           |

|                                  |        |            |        |        |
|----------------------------------|--------|------------|--------|--------|
| Anti-Mouse IgG, Alexa Fluor 488  | donkey | Invitrogen | A21202 | 1:1000 |
| Anti-Mouse IgG, Alexa Fluor 555  | donkey | Invitrogen | A31570 | 1:1000 |
| Anti-Mouse IgG, Alexa Fluor 647  | donkey | Invitrogen | A31571 | 1:1000 |
| Anti-Rabbit IgG, Alexa Fluor 488 | donkey | Invitrogen | A21206 | 1:1000 |
| Anti-Rabbit IgG, Alexa Fluor 555 | donkey | Invitrogen | A31572 | 1:1000 |
| Anti-Rabbit IgG, Alexa Fluor 647 | donkey | Invitrogen | A31573 | 1:1000 |
| Anti-Rat IgG, Alexa Fluor 488    | donkey | Invitrogen | A21208 | 1:1000 |

621

622 **Supplementary Table 2. Settings used for processing published datasets.**

| PMID         | Tissue                 | Age     | Scale factor | PCs used | Harmony integration | Clustering resolution | Re-annotation |
|--------------|------------------------|---------|--------------|----------|---------------------|-----------------------|---------------|
| 3282<br>6893 | SN and cortex          | Adult   | 10000        | 50       | No                  | 0.5                   | No            |
| 3372<br>3434 | multiple               | CS22    | 10000        | 50       | Yes                 | 0.3                   | Yes           |
| 3461<br>6070 | multiple               | GW25    | 10000        | 50       | Yes                 | 0.4                   | Yes           |
| 3292<br>3614 | Neocortex              | GW9-28  | 100000       | 30       | Yes                 | 0.9                   | Yes           |
| 3130<br>3374 | Neocortex              | GW17-18 | 10000        | 30       | Yes                 | 0.5                   | Yes           |
| 2953<br>9641 | Prefrontal cortex      | GW8-26  | 100000       | 30       | Yes                 | 0.9                   | Yes           |
| 2881<br>7799 | PSC-derived astrocytes | -       | 10000        | 30       | No                  | 0.3                   | No            |
| 2771<br>6510 | Ventral midbrain       | GW7-11  | 10000        | 30       | No                  | 0.5                   | No            |

623

624 Supplementary Data 1: Pairwise DEGs of three astrocyte and one neuron populations.

625 Supplementary Data 2: GO enrichment of population enriched DEGs.



626 Supplementary Data 3: Representative enriched GO terms of DEGs for BFP+ and  
627 BFP- astrocytes.

628 Supplementary Data 4: DEGs comparing sorted and unsorted populations.

## 629 **Acknowledgements**

630 We would like to thank Mark Bishop and Joanne Morgan for conducting FACS and  
631 next generation sequencing, respectively. We thank Kathryn Peall and Laura Abram  
632 for providing iPSC-derived neurons for scRNAseq. We also thank the support of the  
633 Supercomputing Wales project, which is part-funded by the European Regional  
634 Development Fund (ERDF) via the Welsh Government.

## 635 **Author Contribution**

636 Z.L. and M.L. conceived the study and designed the experiments. Z.L. performed all  
637 cell experiments and analysed all data. L.C. and M.L. designed the lineage tracing  
638 system, and L.C. generated the cell line with assistance from Z.L. M.R. performed  
639 iCELL8 library preparation. J.M.S., F.W., and V.V. provided guidance and contributed  
640 to general discussions on scRNAseq data analysis. C.W. contributed to the design of  
641 scRNAseq and general discussions throughout the work. Z.L. and M.L. wrote the  
642 paper. All authors edited and approved the paper.

## 643 **Funding**

644 This work was supported by the UK Dementia Research Institute, jointly funded by the  
645 UK Medical Research Council, Alzheimer's Society and Alzheimer's Research UK, to  
646 C.W. (MC\_PC\_17112) and Z.L. (DRI-TRA2021-02), and a seed corn fund to Z.L. from  
647 the Neuroscience and Mental Health Innovation Institute, Cardiff University. Z.L. was  
648 funded by a UK Dementia Research Institute PhD studentship.

## 649 **Data Availability**

650 The sequencing data discussed in this publication have been deposited in NCBI's  
651 Gene Expression Omnibus (Clough and Barrett 2016) and are accessible through a  
652 GEO Series accession number which will be made available upon final publication.

## 653 **Declaration of interests**

654 The authors declare no competing interests.

## 655 **References**

656 Agarwal, D. et al. 2020. A single-cell atlas of the human substantia nigra reveals cell-  
657 specific pathways associated with neurological disorders. *Nat Commun* 11(1), p. 4183.  
658 doi: 10.1038/s41467-020-17876-0

659

660 Ahmed, M., Owens, M. J. S., Toledo, E. M., Arenas, E., Bradley, M. and Ffrench-  
661 Constant, C. 2021. Combinatorial ECM Arrays Identify Cooperative Roles for  
662 Matricellular Proteins in Enhancing the Generation of TH+ Neurons From Human  
663 Pluripotent Cells. *Front Cell Dev Biol* 9, p. 755406. doi: 10.3389/fcell.2021.755406

664

665 Andersson, E. et al. 2006. Identification of intrinsic determinants of midbrain dopamine  
666 neurons. *Cell* 124(2), pp. 393-405. doi: 10.1016/j.cell.2005.10.037

667

668 Barbar, L. et al. 2020. CD49f Is a Novel Marker of Functional and Reactive Human  
669 iPSC-Derived Astrocytes. *Neuron* 107(3), pp. 436-453 e412. doi:  
670 10.1016/j.neuron.2020.05.014

671

672 Barbuti, P. A. et al. 2020. iPSC-derived midbrain astrocytes from Parkinson's disease  
673 patients carrying pathogenic SNCA mutations exhibit alpha-synuclein aggregation,  
674 mitochondrial fragmentation and excess calcium release. *bioRxiv*, p.  
675 2020.2004.2027.053470. doi: 10.1101/2020.04.27.053470

676

- 677 Batiuk, M. Y. et al. 2020. Identification of region-specific astrocyte subtypes at single  
678 cell resolution. *Nature Communications* 11(1), doi: 10.1038/s41467-019-14198-8  
679
- 680 Bayraktar, O. A. et al. 2020. Astrocyte layers in the mammalian cerebral cortex  
681 revealed by a single-cell in situ transcriptomic map. *Nature Neuroscience* 23(4), pp.  
682 500-509. doi: 10.1038/s41593-020-0602-1  
683
- 684 Bhaduri, A. et al. 2021. An atlas of cortical arealization identifies dynamic molecular  
685 signatures. *Nature* 598(7879), pp. 200-204. doi: 10.1038/s41586-021-03910-8  
686
- 687 Bifsha, P., Balsalobre, A. and Drouin, J. 2017. Specificity of Pitx3-Dependent Gene  
688 Regulatory Networks in Subsets of Midbrain Dopamine Neurons. *Molecular*  
689 *Neurobiology* 54(7), pp. 4921-4935. doi: 10.1007/s12035-016-0040-y  
690
- 691 Booth, H. D. E., Hirst, W. D. and Wade-Martins, R. 2017. The Role of Astrocyte  
692 Dysfunction in Parkinson's Disease Pathogenesis. *Trends in neurosciences* 40(6), pp.  
693 358-370. doi: 10.1016/j.tins.2017.04.001  
694
- 695 Booth, H. D. E. et al. 2019. RNA sequencing reveals MMP2 and TGFB1  
696 downregulation in LRRK2 G2019S Parkinson's iPSC-derived astrocytes. *Neurobiol*  
697 *Dis* 129, pp. 56-66. doi: 10.1016/j.nbd.2019.05.006  
698
- 699 Bradley, R. A. et al. 2019. Regionally specified human pluripotent stem cell-derived  
700 astrocytes exhibit different molecular signatures and functional properties.  
701 *Development* 146(13), p. dev170910. doi: 10.1242/dev.170910  
702
- 703 Cardo, L. F., Monzón-Sandoval, J., Li, Z., Webber, C. and Li, M. 2023. Single-Cell  
704 Transcriptomics and In Vitro Lineage Tracing Reveals Differential Susceptibility of  
705 Human iPSC-Derived Midbrain Dopaminergic Neurons in a Cellular Model of  
706 Parkinson's Disease. *Cells* 12(24), doi: 10.3390/cells12242860  
707
- 708 Carlson, M. 2019. org.Hs.eg.db: Genome wide annotation for Human. R package  
709 version 3.8.2.  
710

- 711 Chai, H. et al. 2017. Neural Circuit-Specialized Astrocytes: Transcriptomic, Proteomic,  
712 Morphological, and Functional Evidence. *Neuron* 95(3), pp. 531-549 e539. doi:  
713 10.1016/j.neuron.2017.06.029
- 714
- 715 Chandrasekaran, A., Avci, H. X., Leist, M., Kobilák, J. and Dinnyés, A. 2016.  
716 Astrocyte Differentiation of Human Pluripotent Stem Cells: New Tools for Neurological  
717 Disorder Research. *Frontiers in cellular neuroscience* 10, pp. 215-215. doi:  
718 10.3389/fncel.2016.00215
- 719
- 720 Chung, N. C. and Storey, J. D. 2015. Statistical significance of variables driving  
721 systematic variation in high-dimensional data. *Bioinformatics* 31(4), pp. 545-554. doi:  
722 10.1093/bioinformatics/btu674
- 723
- 724 Clough, E. and Barrett, T. 2016. The Gene Expression Omnibus Database. *Methods*  
725 *Mol Biol* 1418, pp. 93-110. doi: 10.1007/978-1-4939-3578-9\_5
- 726
- 727 Crompton, L. A., McComish, S. F., Stathakos, P., Cordero-Llana, O., Lane, J. D. and  
728 Caldwell, M. A. 2021. Efficient and Scalable Generation of Human Ventral Midbrain  
729 Astrocytes from Human-Induced Pluripotent Stem Cells. *Journal of Visualized*  
730 *Experiments* (176), doi: 10.3791/62095
- 731
- 732 Crompton, L. A., McComish, S. F., Steward, T. G. J., Whitcomb, D. J., Lane, J. D. and  
733 Caldwell, M. A. 2023. Human stem cell-derived ventral midbrain astrocytes exhibit a  
734 region-specific secretory profile. *Brain Commun* 5(2), p. fcad114. doi:  
735 10.1093/braincomms/fcad114
- 736
- 737 de Rus Jacquet, A., Tancredi, J. L., Lemire, A. L., DeSantis, M. C., Li, W. P. and  
738 O'Shea, E. K. 2021. The LRRK2 G2019S mutation alters astrocyte-to-neuron  
739 communication via extracellular vesicles and induces neuron atrophy in a human  
740 iPSC-derived model of Parkinson's disease. *Elife* 10, p. 2020.2007.2002.178574. doi:  
741 10.7554/eLife.73062
- 742
- 743 Deneen, B., Ho, R., Lukaszewicz, A., Hochstim, C. J., Gronostajski, R. M. and  
744 Anderson, D. J. 2006. The Transcription Factor NFIA Controls the Onset of  
745 Gliogenesis in the Developing Spinal Cord. *Neuron* 52(6), pp. 953-968. doi:  
746 10.1016/j.neuron.2006.11.019

747

748 di Domenico, A. et al. 2019. Patient-Specific iPSC-Derived Astrocytes Contribute to  
749 Non-Cell-Autonomous Neurodegeneration in Parkinson's Disease. *Stem cell reports*  
750 12(2), pp. 213-229. doi: 10.1016/j.stemcr.2018.12.011

751

752 Dobin, A. et al. 2013. STAR: ultrafast universal RNA-seq aligner. *Bioinformatics* 29(1),  
753 pp. 15-21. doi: 10.1093/bioinformatics/bts635

754

755 Duan, D., Fu, Y., Paxinos, G. and Watson, C. 2013. Spatiotemporal expression  
756 patterns of Pax6 in the brain of embryonic, newborn, and adult mice. *Brain Structure*  
757 *and Function* 218(2), pp. 353-372. doi: 10.1007/s00429-012-0397-2

758

759 Endo, F. et al. 2022. Molecular basis of astrocyte diversity and morphology across the  
760 CNS in health and disease. *Science* 378(6619), p. eadc9020. doi:  
761 doi:10.1126/science.adc9020

762

763 Eze, U. C., Bhaduri, A., Haeussler, M., Nowakowski, T. J. and Kriegstein, A. R. 2021.  
764 Single-cell atlas of early human brain development highlights heterogeneity of human  
765 neuroepithelial cells and early radial glia. *Nature Neuroscience* 24(4), pp. 584-594.  
766 doi: 10.1038/s41593-020-00794-1

767

768 Falk, A. et al. 2012. Capture of neuroepithelial-like stem cells from pluripotent stem  
769 cells provides a versatile system for in vitro production of human neurons. *PLOS ONE*  
770 7(1), p. e29597. doi: 10.1371/journal.pone.0029597

771

772 Fan, X. et al. 2020. Single-cell transcriptome analysis reveals cell lineage specification  
773 in temporal-spatial patterns in human cortical development. *Science Advances* 6(34),  
774 p. eaaz2978. doi: doi:10.1126/sciadv.aaz2978

775

776 Finak, G. et al. 2015. MAST: a flexible statistical framework for assessing  
777 transcriptional changes and characterizing heterogeneity in single-cell RNA  
778 sequencing data. *Genome Biology* 16(1), p. 278. doi: 10.1186/s13059-015-0844-5

779

780 Gabay, L., Lowell, S., Rubin, L. L. and Anderson, D. J. 2003. Deregulation of  
781 dorsoventral patterning by FGF confers trilineage differentiation capacity on CNS stem  
782 cells in vitro. *Neuron* 40(3), pp. 485-499. doi: 10.1016/s0896-6273(03)00637-8

783

784 Hedegaard, A., Monzón-Sandoval, J., Newey, S. E., Whiteley, E. S., Webber, C. and  
785 Akerman, C. J. 2020. Pro-maturational Effects of Human iPSC-Derived Cortical  
786 Astrocytes upon iPSC-Derived Cortical Neurons. *Stem cell reports* 15(1), pp. 38-51.  
787 doi: <https://doi.org/10.1016/j.stemcr.2020.05.003>

788

789 Holmqvist, S. et al. 2015. Generation of human pluripotent stem cell reporter lines for  
790 the isolation of and reporting on astrocytes generated from ventral midbrain and  
791 ventral spinal cord neural progenitors. *Stem Cell Research* 15(1), pp. 203-220. doi:  
792 <https://doi.org/10.1016/j.scr.2015.05.014>

793

794 Houweling, A. C., Dildrop, R., Peters, T., Mummenhoff, J., Moorman, A. F. M., Rütger,  
795 U. and Christoffels, V. M. 2001. Gene and cluster-specific expression of the Iroquois  
796 family members during mouse development. *Mechanisms of Development* 107(1), pp.  
797 169-174. doi: [https://doi.org/10.1016/S0925-4773\(01\)00451-8](https://doi.org/10.1016/S0925-4773(01)00451-8)

798

799 Itoh, N. et al. 2018. Cell-specific and region-specific transcriptomics in the multiple  
800 sclerosis model: Focus on astrocytes. *Proceedings of the National Academy of  
801 Sciences* 115(2), pp. E302-E309. doi: doi:10.1073/pnas.1716032115

802

803 Jaeger, I. et al. 2011. Temporally controlled modulation of FGF/ERK signaling directs  
804 midbrain dopaminergic neural progenitor fate in mouse and human pluripotent stem  
805 cells. *Development* 138(20), pp. 4363-4374. doi: 10.1242/dev.066746

806

807 Jain, M., Armstrong, R. J., Tyers, P., Barker, R. A. and Rosser, A. E. 2003. GABAergic  
808 immunoreactivity is predominant in neurons derived from expanded human neural  
809 precursor cells in vitro. *Exp Neurol* 182(1), pp. 113-123. doi: 10.1016/s0014-  
810 4886(03)00055-4

811

812 Kamath, T. et al. 2022. Single-cell genomic profiling of human dopamine neurons  
813 identifies a population that selectively degenerates in Parkinson's disease. *Nature  
814 Neuroscience* 25(5), pp. 588-595. doi: 10.1038/s41593-022-01061-1

815

816 Koch, P., Opitz, T., Steinbeck, J. A., Ladewig, J. and Brüstle, O. 2009. A rosette-type,  
817 self-renewing human ES cell-derived neural stem cell with potential for in vitro  
818 instruction and synaptic integration. *Proc Natl Acad Sci U S A* 106(9), pp. 3225-3230.  
819 doi: 10.1073/pnas.0808387106

820

821 Kostuk, E. W., Cai, J. and Iacovitti, L. 2019. Subregional differences in astrocytes  
822 underlie selective neurodegeneration or protection in Parkinson's disease models in  
823 culture. *Glia* 67(8), pp. 1542-1557. doi: 10.1002/glia.23627

824

825 Krencik, R., Weick, J. P., Liu, Y., Zhang, Z.-J. and Zhang, S.-C. 2011. Specification of  
826 transplantable astroglial subtypes from human pluripotent stem cells. *Nature*  
827 *Biotechnology* 29, p. 528. doi: 10.1038/nbt.1877

828 <https://www.nature.com/articles/nbt.1877#supplementary-information>

829

830 La Manno, G. et al. 2016. Molecular Diversity of Midbrain Development in Mouse,  
831 Human, and Stem Cells. *Cell* 167(2), pp. 566-580.e519. doi:  
832 10.1016/j.cell.2016.09.027

833

834 Li, Y. et al. 2023. Spatiotemporal transcriptome atlas reveals the regional specification  
835 of the developing human brain. *Cell* 186(26), pp. 5892-5909.e5822. doi:  
836 <https://doi.org/10.1016/j.cell.2023.11.016>

837

838 Liao, Y., Smyth, G. K. and Shi, W. 2013. The Subread aligner: fast, accurate and  
839 scalable read mapping by seed-and-vote. *Nucleic Acids Res* 41(10), p. e108. doi:  
840 10.1093/nar/gkt214

841

842 Lin, Y.-T. et al. 2018. APOE4 Causes Widespread Molecular and Cellular Alterations  
843 Associated with Alzheimer's Disease Phenotypes in Human iPSC-Derived Brain Cell  
844 Types. *Neuron* 98(6), pp. 1141-1154.e1147. doi:  
845 <https://doi.org/10.1016/j.neuron.2018.05.008>

846

847 Liu, Y. et al. 2004. CD44 expression identifies astrocyte-restricted precursor cells.  
848 *Developmental Biology* 276(1), pp. 31-46. doi:  
849 <https://doi.org/10.1016/j.ydbio.2004.08.018>

850

- 851 Lozzi, B., Huang, T. W., Sardar, D., Huang, A. Y. S. and Deneen, B. 2020. Regionally  
852 Distinct Astrocytes Display Unique Transcription Factor Profiles in the Adult Brain.  
853 *Frontiers in Neuroscience* 14, doi: 10.3389/fnins.2020.00061
- 854
- 855 Makarava, N., Chang, J. C.-Y., Kushwaha, R. and Baskakov, I. V. 2019. Region-  
856 Specific Response of Astrocytes to Prion Infection. *Frontiers in Neuroscience* 13, doi:  
857 10.3389/fnins.2019.01048
- 858
- 859 Matsunaga, E., Araki, I. and Nakamura, H. 2001. Role of Pax3/7 in the tectum  
860 regionalization. *Development* 128(20), pp. 4069-4077. doi: 10.1242/dev.128.20.4069
- 861
- 862 McCarthy, D. J., Campbell, K. R., Lun, A. T. L. and Wills, Q. F. 2017. Scater: pre-  
863 processing, quality control, normalization and visualization of single-cell RNA-seq data  
864 in R. *Bioinformatics* 33(8), pp. 1179-1186. doi: 10.1093/bioinformatics/btw777
- 865
- 866 Molofsky, A. V. et al. 2012. Astrocytes and disease: a neurodevelopmental  
867 perspective. *Genes & Development* 26(9), pp. 891-907. doi: 10.1101/gad.188326.112
- 868
- 869 Morel, L. et al. 2017. Molecular and Functional Properties of Regional Astrocytes in  
870 the Adult Brain. *J Neurosci* 37(36), pp. 8706-8717. doi: 10.1523/JNEUROSCI.3956-  
871 16.2017
- 872
- 873 Nolbrant, S., Heuer, A., Parmar, M. and Kirkeby, A. 2017. Generation of high-purity  
874 human ventral midbrain dopaminergic progenitors for in vitro maturation and  
875 intracerebral transplantation. *Nature Protocols* 12(9), pp. 1962-1979. doi:  
876 10.1038/nprot.2017.078
- 877
- 878 Oberheim, N. A. et al. 2009. Uniquely hominid features of adult human astrocytes. *J*  
879 *Neurosci* 29(10), pp. 3276-3287. doi: 10.1523/jneurosci.4707-08.2009
- 880
- 881 Peteri, U.-K., Pitkonen, J., Utami, K. H., Paavola, J., Roybon, L., Pouladi, M. A. and  
882 Castrén, M. L. 2021. Generation of the Human Pluripotent Stem-Cell-Derived  
883 Astrocyte Model with Forebrain Identity. *Brain sciences* 11(2), p. 209. doi:  
884 10.3390/brainsci11020209



885

886 Phatnani, H. and Maniatis, T. 2015. Astrocytes in neurodegenerative disease. *Cold*  
887 *Spring Harbor perspectives in biology* 7(6), p. a020628. doi:  
888 10.1101/cshperspect.a020628

889

890 Polioudakis, D. et al. 2019. A Single-Cell Transcriptomic Atlas of Human Neocortical  
891 Development during Mid-gestation. *Neuron* 103(5), pp. 785-801.e788. doi:  
892 10.1016/j.neuron.2019.06.011

893

894 Roybon, L. et al. 2013. Human stem cell-derived spinal cord astrocytes with defined  
895 mature or reactive phenotypes. *Cell Rep* 4(5), pp. 1035-1048. doi:  
896 10.1016/j.celrep.2013.06.021

897

898 Schindelin, J. et al. 2012. Fiji: an open-source platform for biological-image analysis.  
899 *Nature Methods* 9(7), pp. 676-682. doi: 10.1038/nmeth.2019

900

901 Schlicker, A., Domingues, F. S., Rahnenführer, J. and Lengauer, T. 2006. A new  
902 measure for functional similarity of gene products based on Gene Ontology. *BMC*  
903 *Bioinformatics* 7(1), p. 302. doi: 10.1186/1471-2105-7-302

904

905 Schober, A. L., Wicki-Stordeur, L. E., Murai, K. K. and Swayne, L. A. 2022.  
906 Foundations and implications of astrocyte heterogeneity during brain development  
907 and disease. *Trends in neurosciences* 45(9), pp. 692-703. doi:  
908 10.1016/j.tins.2022.06.009

909

910 Serio, A. et al. 2013. Astrocyte pathology and the absence of non-cell autonomy in an  
911 induced pluripotent stem cell model of TDP-43 proteinopathy. *Proceedings of the*  
912 *National Academy of Sciences of the United States of America* 110(12), pp. 4697-  
913 4702. doi: 10.1073/pnas.1300398110

914

915 Sloan, S. A. et al. 2017. Human Astrocyte Maturation Captured in 3D Cerebral Cortical  
916 Spheroids Derived from Pluripotent Stem Cells. *Neuron* 95(4), pp. 779-790 e776. doi:  
917 10.1016/j.neuron.2017.07.035

918

- 919 Sonninen, T.-M. et al. 2020. Metabolic alterations in Parkinson's disease astrocytes.  
920 *Scientific Reports* 10(1), p. 14474. doi: 10.1038/s41598-020-71329-8
- 921
- 922 Stirling, D. R., Swain-Bowden, M. J., Lucas, A. M., Carpenter, A. E., Cimini, B. A. and  
923 Goodman, A. 2021. CellProfiler 4: improvements in speed, utility and usability. *BMC*  
924 *Bioinformatics* 22(1), p. 433. doi: 10.1186/s12859-021-04344-9
- 925
- 926 Stolt, C. C., Lommes, P., Sock, E., Chaboissier, M.-C., Schedl, A. and Wegner, M.  
927 2003. The Sox9 transcription factor determines glial fate choice in the developing  
928 spinal cord. *Genes & Development* 17(13), pp. 1677-1689. doi: 10.1101/gad.259003
- 929
- 930 Strelau, J. et al. 2000. Growth/differentiation factor-15/macrophage inhibitory cytokine-  
931 1 is a novel trophic factor for midbrain dopaminergic neurons in vivo. *J Neurosci*  
932 20(23), pp. 8597-8603. doi: 10.1523/jneurosci.20-23-08597.2000
- 933
- 934 Stuart, T. et al. 2019. Comprehensive Integration of Single-Cell Data. *Cell* 177(7), pp.  
935 1888-1902.e1821. doi: 10.1016/j.cell.2019.05.031
- 936
- 937 Sun, Y. et al. 2008. Long-term tripotent differentiation capacity of human neural stem  
938 (NS) cells in adherent culture. *Mol Cell Neurosci* 38(2), pp. 245-258. doi:  
939 10.1016/j.mcn.2008.02.014
- 940
- 941 Supek, F., Bošnjak, M., Škunca, N. and Šmuc, T. 2011. REVIGO Summarizes and  
942 Visualizes Long Lists of Gene Ontology Terms. *PLOS ONE* 6(7), p. e21800. doi:  
943 10.1371/journal.pone.0021800
- 944
- 945 Takata, N. and Hirase, H. 2008. Cortical Layer 1 and Layer 2/3 Astrocytes Exhibit  
946 Distinct Calcium Dynamics In Vivo. *PLOS ONE* 3(6), p. e2525. doi:  
947 10.1371/journal.pone.0002525
- 948
- 949 Tcw, J. et al. 2017. An Efficient Platform for Astrocyte Differentiation from Human  
950 Induced Pluripotent Stem Cells. *Stem cell reports* 9(2), pp. 600-614. doi:  
951 10.1016/j.stemcr.2017.06.018
- 952

- 953 Team, R. C. 2023. : A Language and Environment for Statistical Computing. Vienna,  
954 Austria: R Foundation for Statistical Computing, .
- 955
- 956 Verkhratsky, A. and Nedergaard, M. 2018. Physiology of astroglia. *Physiological*  
957 *Reviews* 98(1), pp. 239-389. doi: 10.1152/physrev.00042.2016
- 958
- 959 Xin, W., Schuebel, K. E., Jair, K.-w., Cimbro, R., De Biase, L. M., Goldman, D. and  
960 Bonci, A. 2019. Ventral midbrain astrocytes display unique physiological features and  
961 sensitivity to dopamine D2 receptor signaling. *Neuropsychopharmacology* 44(2), pp.  
962 344-355. doi: 10.1038/s41386-018-0151-4
- 963
- 964 Yun, W. et al. 2019. Generation of Anterior Hindbrain-Specific, Glial-Restricted  
965 Progenitor-Like Cells from Human Pluripotent Stem Cells. *Stem Cells and*  
966 *Development* 28(10), pp. 633-648. doi: 10.1089/scd.2019.0033
- 967
- 968 Zhong, S. et al. 2018. A single-cell RNA-seq survey of the developmental landscape  
969 of the human prefrontal cortex. *Nature* 555(7697), pp. 524-528. doi:  
970 10.1038/nature25980
- 971
- 972 Zhou, S. et al. 2016. Neurosphere Based Differentiation of Human iPSC Improves  
973 Astrocyte Differentiation. *Stem Cells Int* 2016, p. 4937689. doi: 10.1155/2016/4937689
- 974
- 975 Zhu, Q., Shah, S., Dries, R., Cai, L. and Yuan, G. C. 2018. Identification of spatially  
976 associated subpopulations by combining scRNAseq and sequential fluorescence in  
977 situ hybridization data. *Nat Biotechnol* 36(12), pp. 1183-1190. doi: 10.1038/nbt.4260
- 978
- 979
